# Supplementary material for: Concise asymmetric syntheses of novel phenanthroquinolizidines
Source: Royal Society of Chemistry journal article supplement (doi:10.1039/c5ob02624e), 2016-01-01

## Concise asymmetric syntheses of novel phenanthroquinolizidines

Cintia Anton-Torrecillas,<sup>a</sup> María Isabel Loza,<sup>b</sup> José Brea<sup>b</sup> and Jose C. Gonzalez-Gomez,<sup>\*a</sup>

<sup>a</sup>Departamento de Química Orgánica, Facultad de Ciencias and Instituto de Síntesis Orgánica (ISO), Universidad de Alicante, Apdo. 99, 03080 Alicante, Spain.

<sup>b</sup>Grupo de Investigación Biofarma. USEF screeningplatform. Centro de Investigación en Medicina Molecular y Enfermedades Crónicas (CIMUS). Universidad de Santiago de Compostela. Avda de Barcelona s/n. Santiago de Compostela, Spain.

[josecarlos.gonzalez@ua.es](mailto:josecarlos.gonzalez@ua.es)

| Content                                                                               | Page |
|---------------------------------------------------------------------------------------|------|
| <sup>1</sup> H NMR and <sup>13</sup> C NMR spectra of compounds <b>2 to 7</b>         | 2    |
| <sup>1</sup> H NMR, <sup>13</sup> C NMR and HSQC spectra of compound <b>8</b>         | 15   |
| HPLC traces of <i>rac-8</i> and <i>ent-8/8</i>                                        | 18   |
| <sup>1</sup> H NMR, <sup>13</sup> C NMR, COSY and NOESY spectra of compound <b>9</b>  | 19   |
| <sup>1</sup> H NMR, <sup>13</sup> C NMR, COSY and DPGFSE-NOE of compound <b>10</b>    | 23   |
| HPLC traces of compounds <b>10/ ent-10</b>                                            | 27   |
| Cytotoxicity assays of compounds <b>8/ent-8</b> , <b>9/ent-9</b> and <b>10/ent-10</b> | 28   |

<sup>1</sup>H NMR (300 MHz, CDCl<sub>3</sub>)

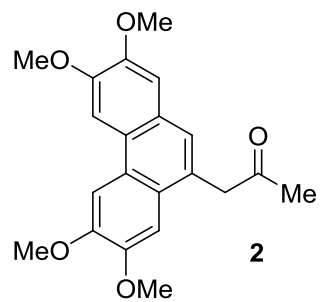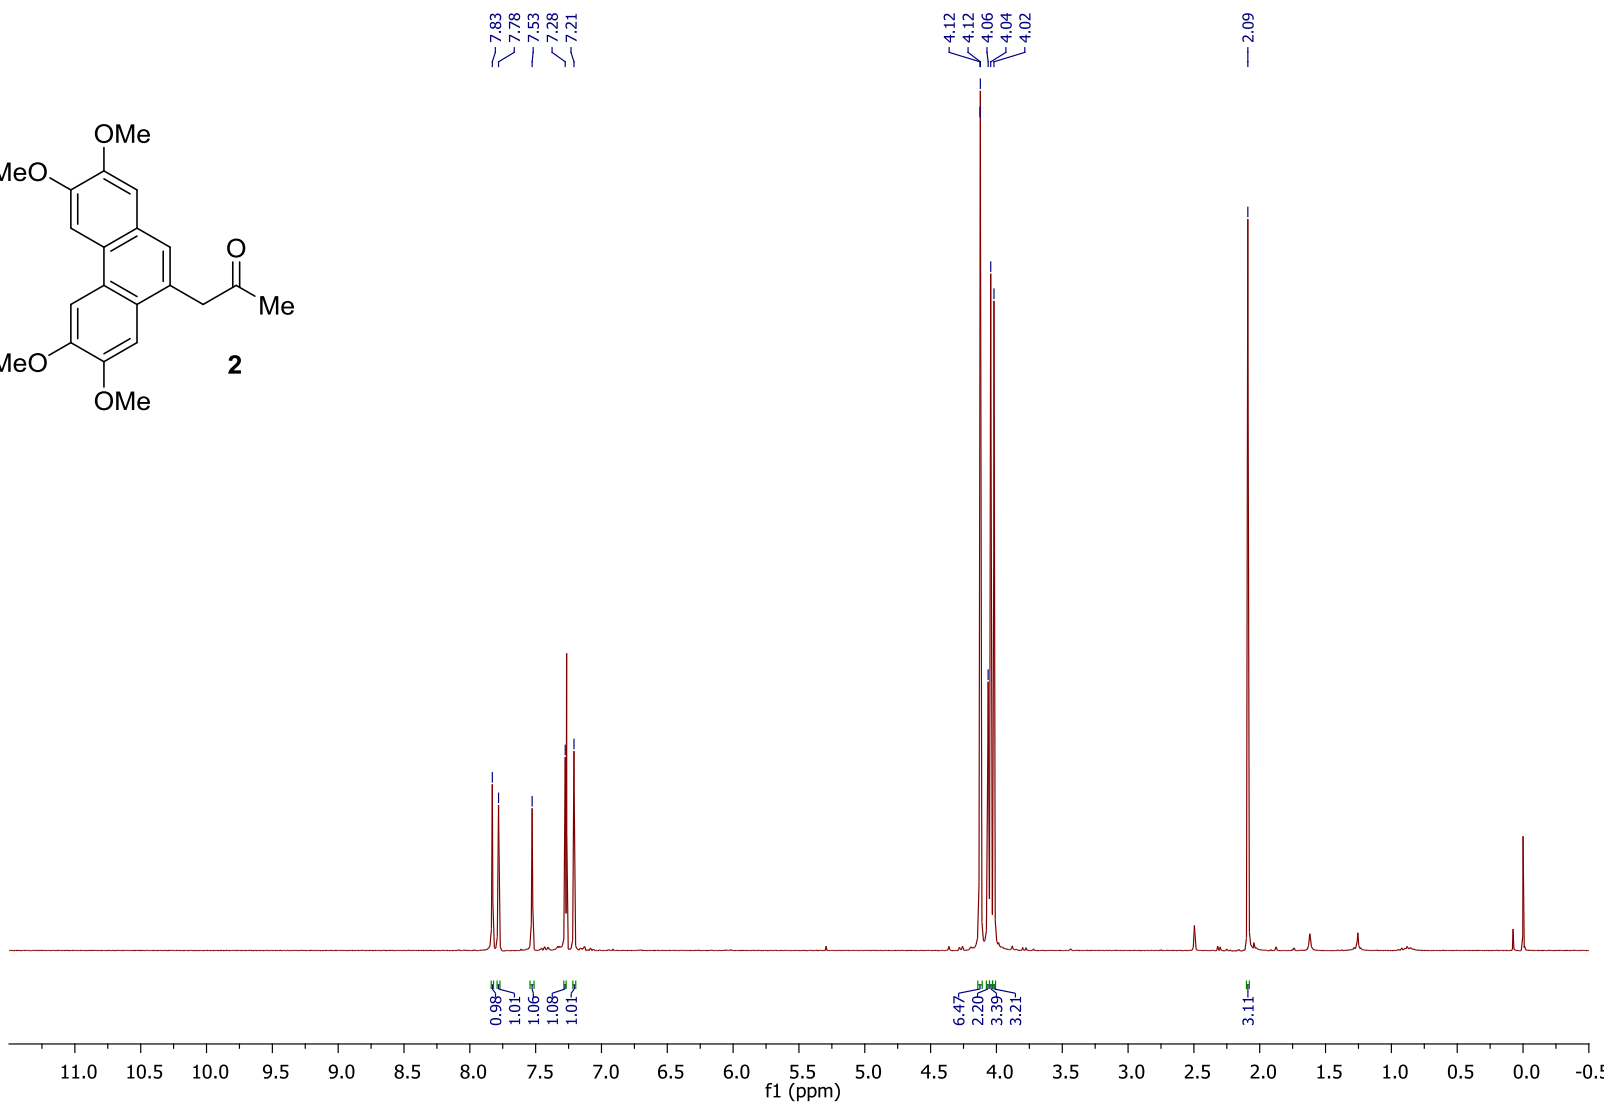

$^{13}\text{C}$  NMR (75 MHz,  $\text{CDCl}_3$ )

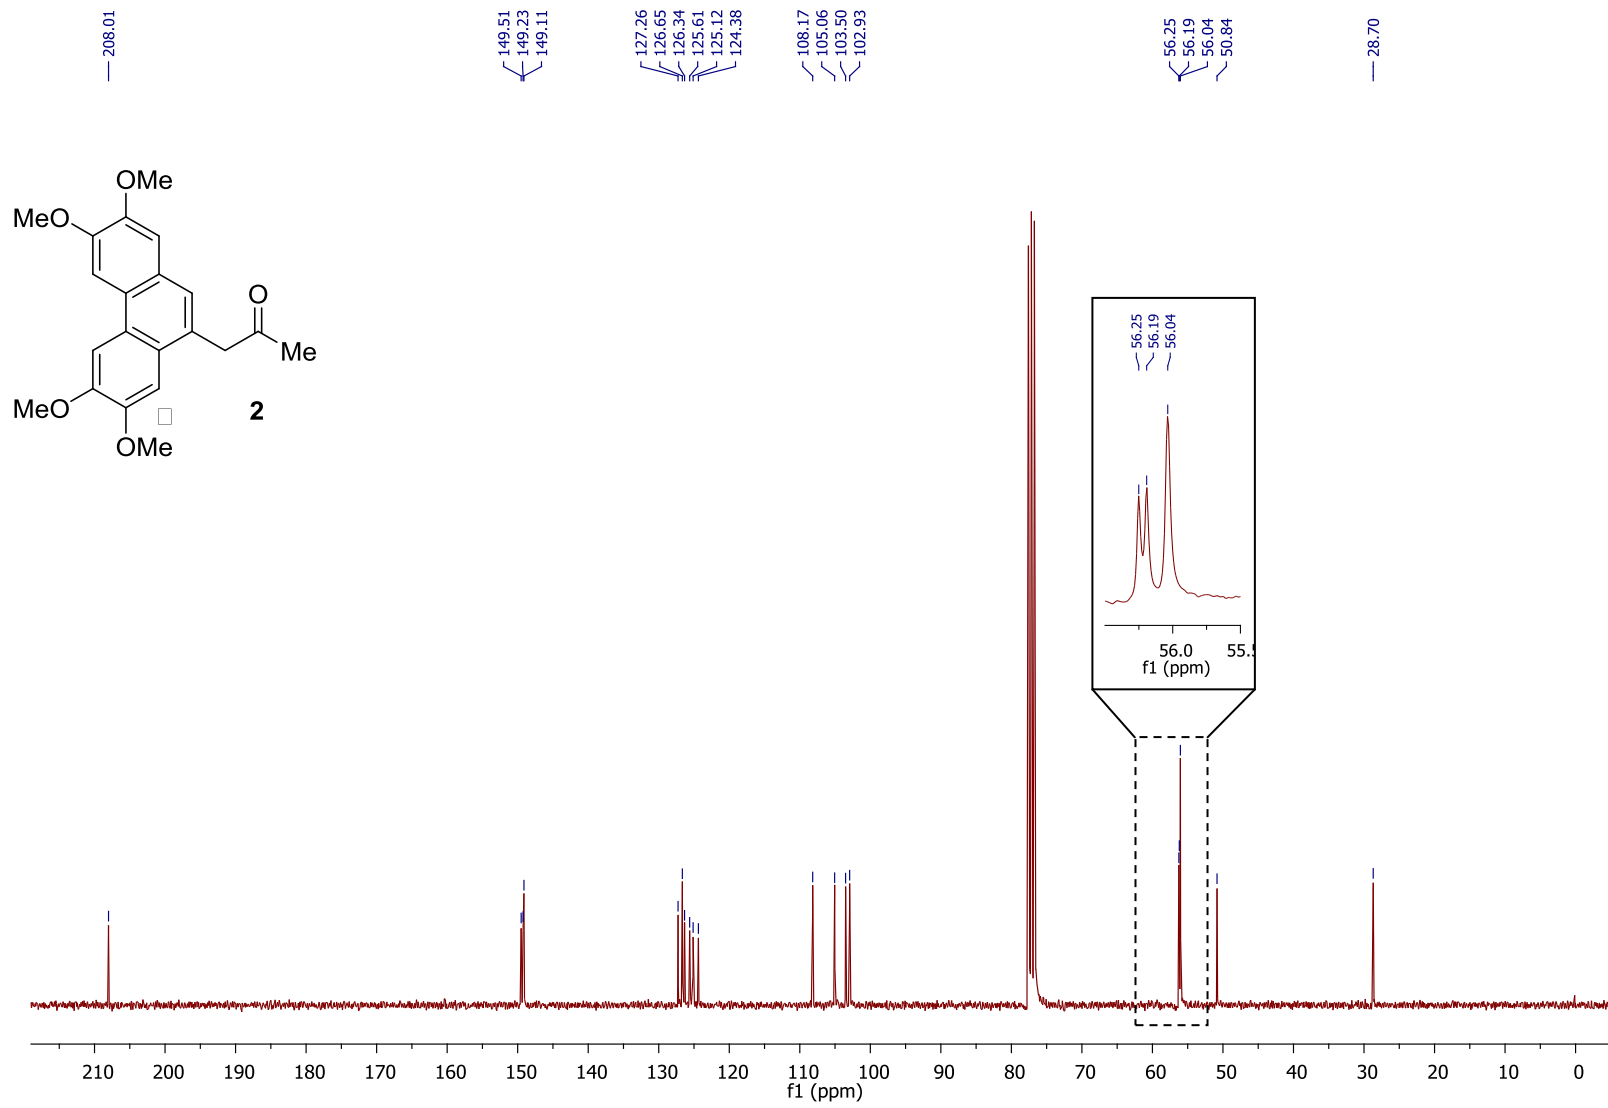

$^1\text{H}$  NMR (300 MHz,  $\text{CDCl}_3$ )

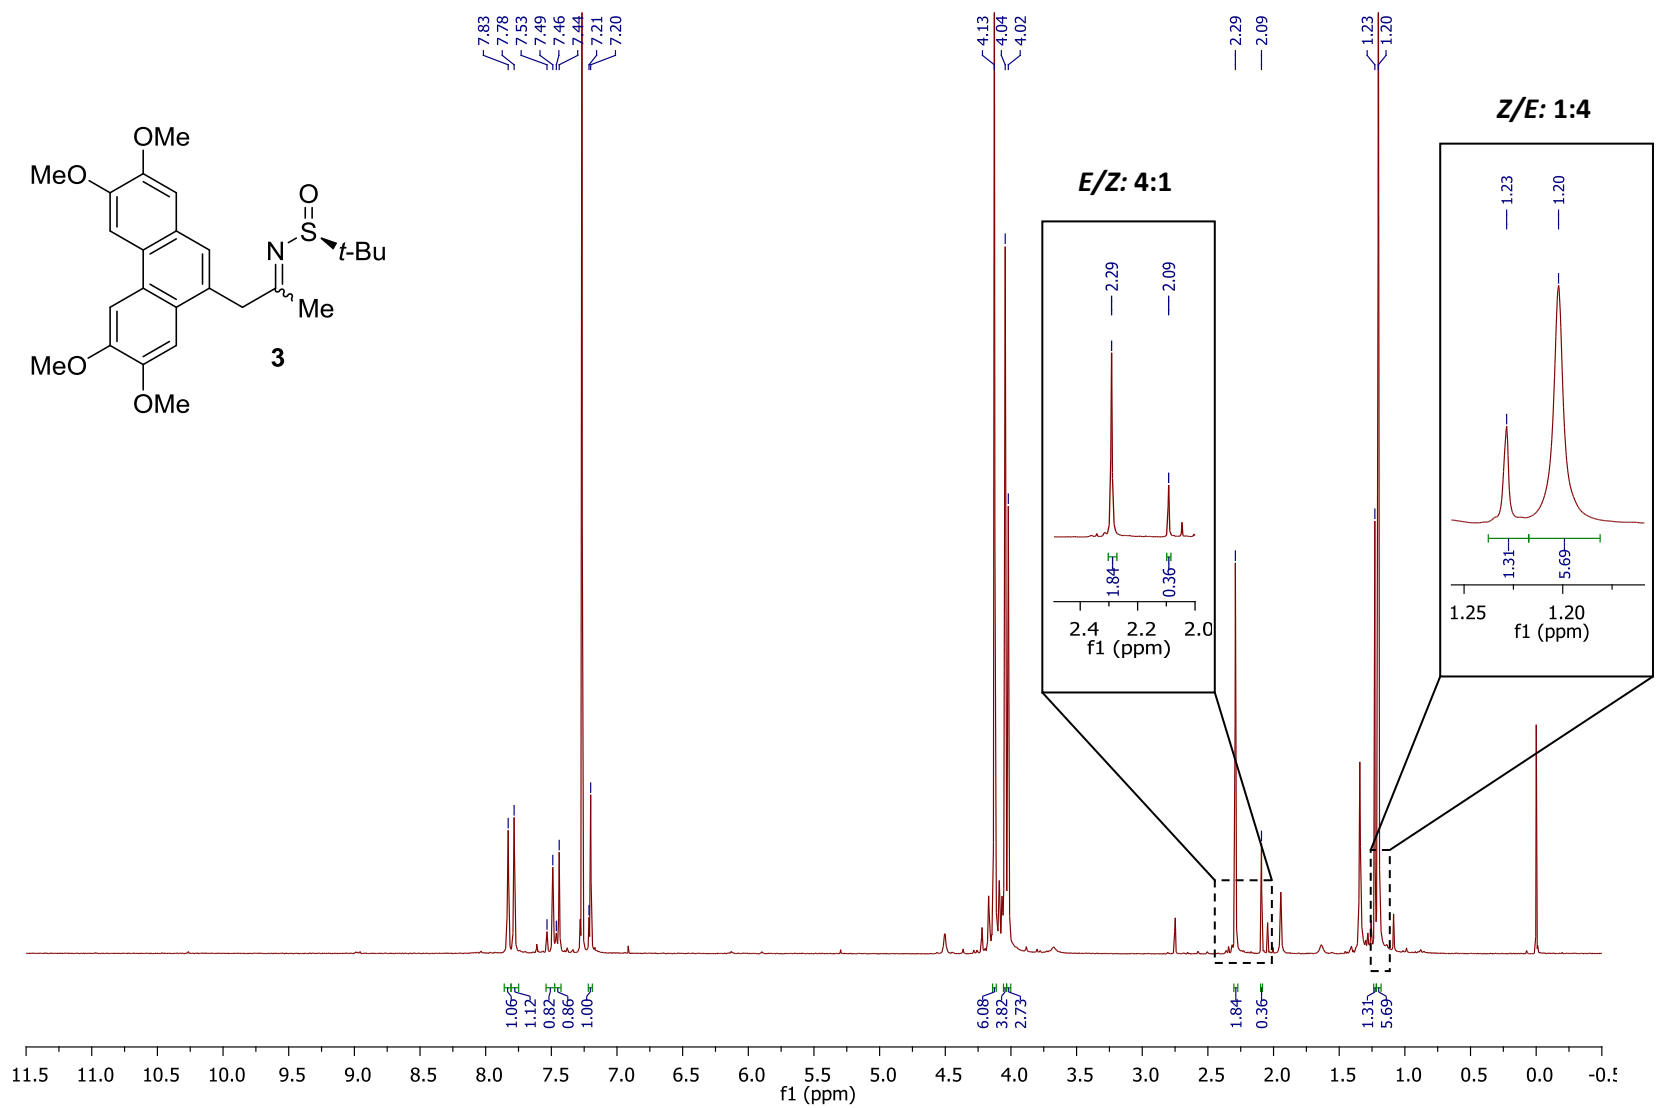

<sup>13</sup>C NMR (75 MHz, CDCl<sub>3</sub>)

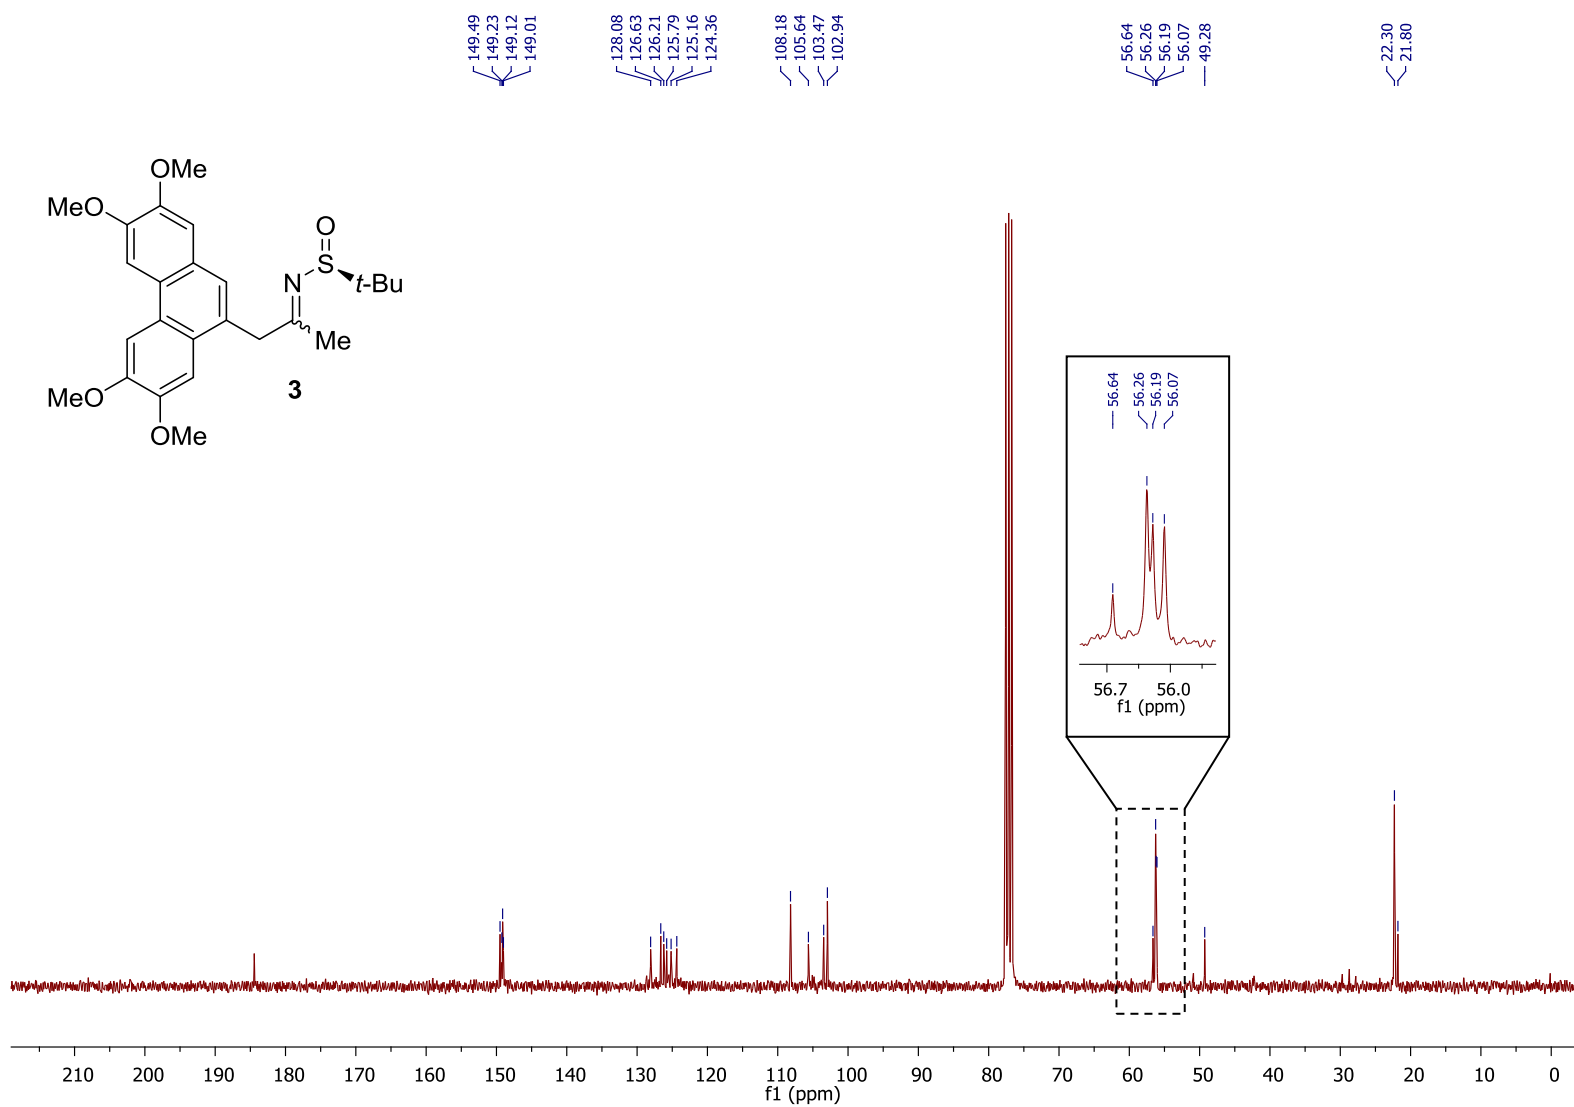

<sup>1</sup>H NMR (300 MHz, CDCl<sub>3</sub>)

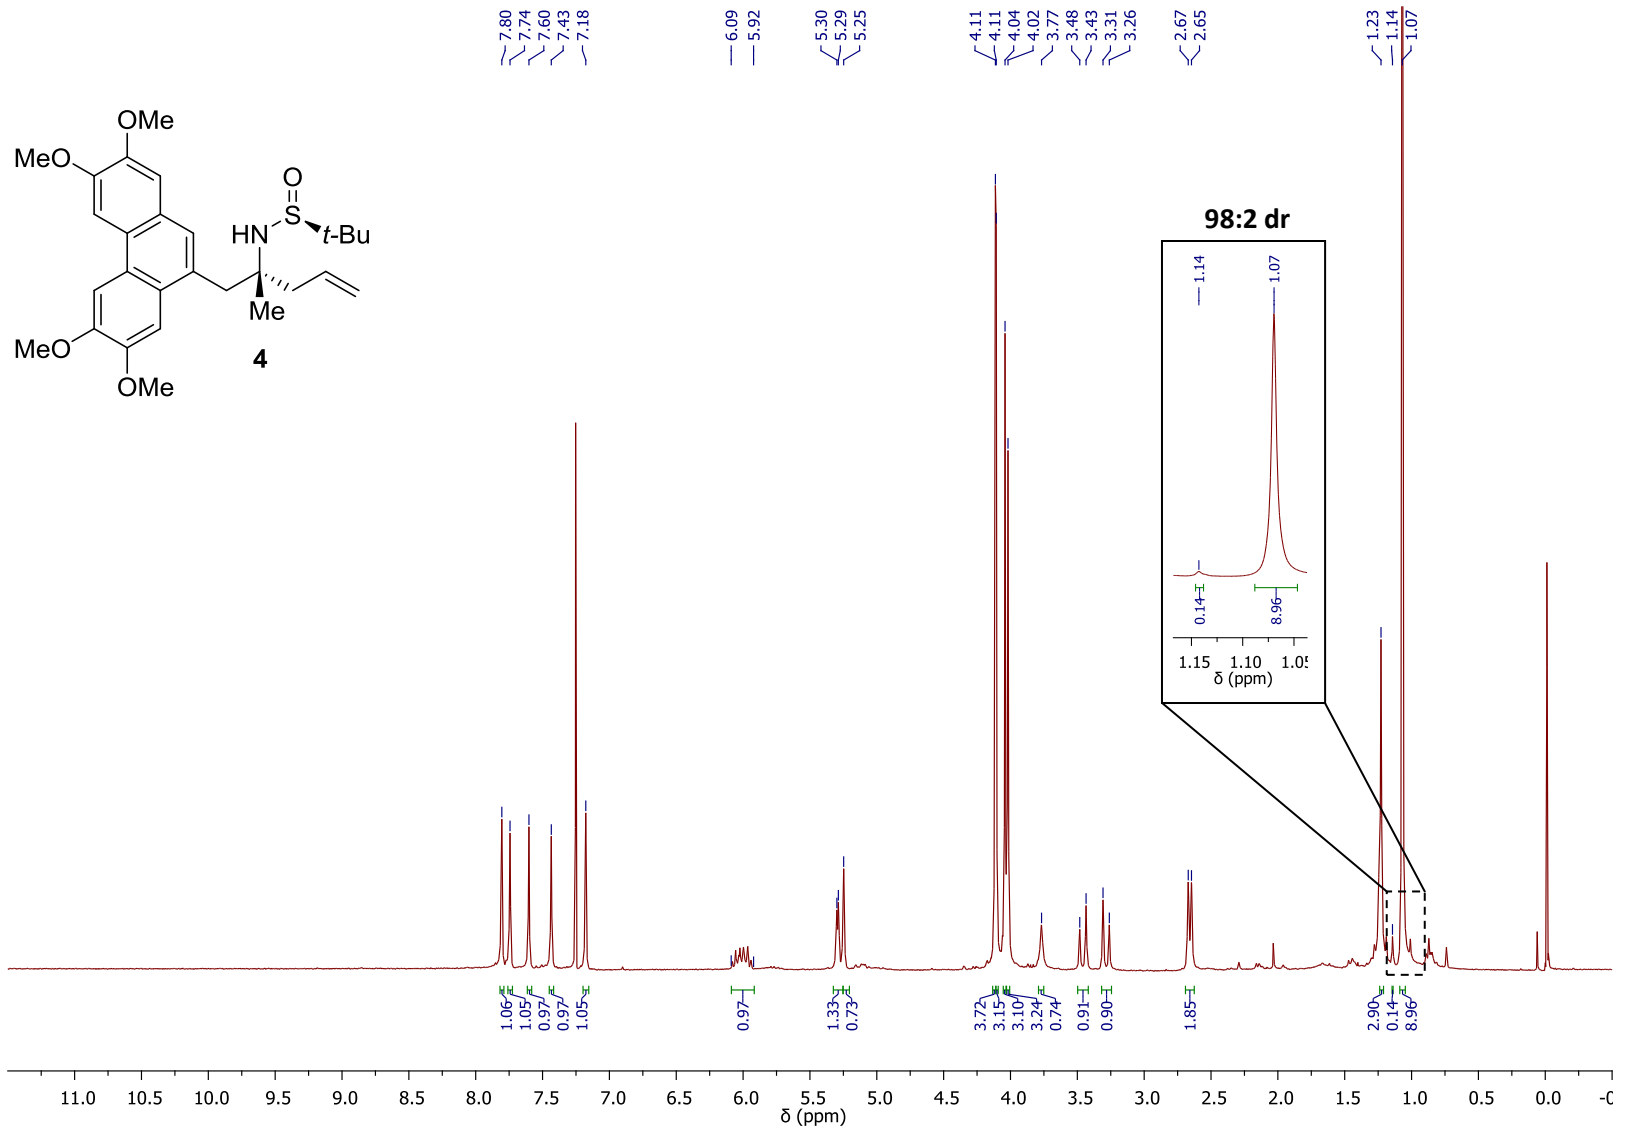

<sup>13</sup>C NMR (75 MHz, CDCl<sub>3</sub>)

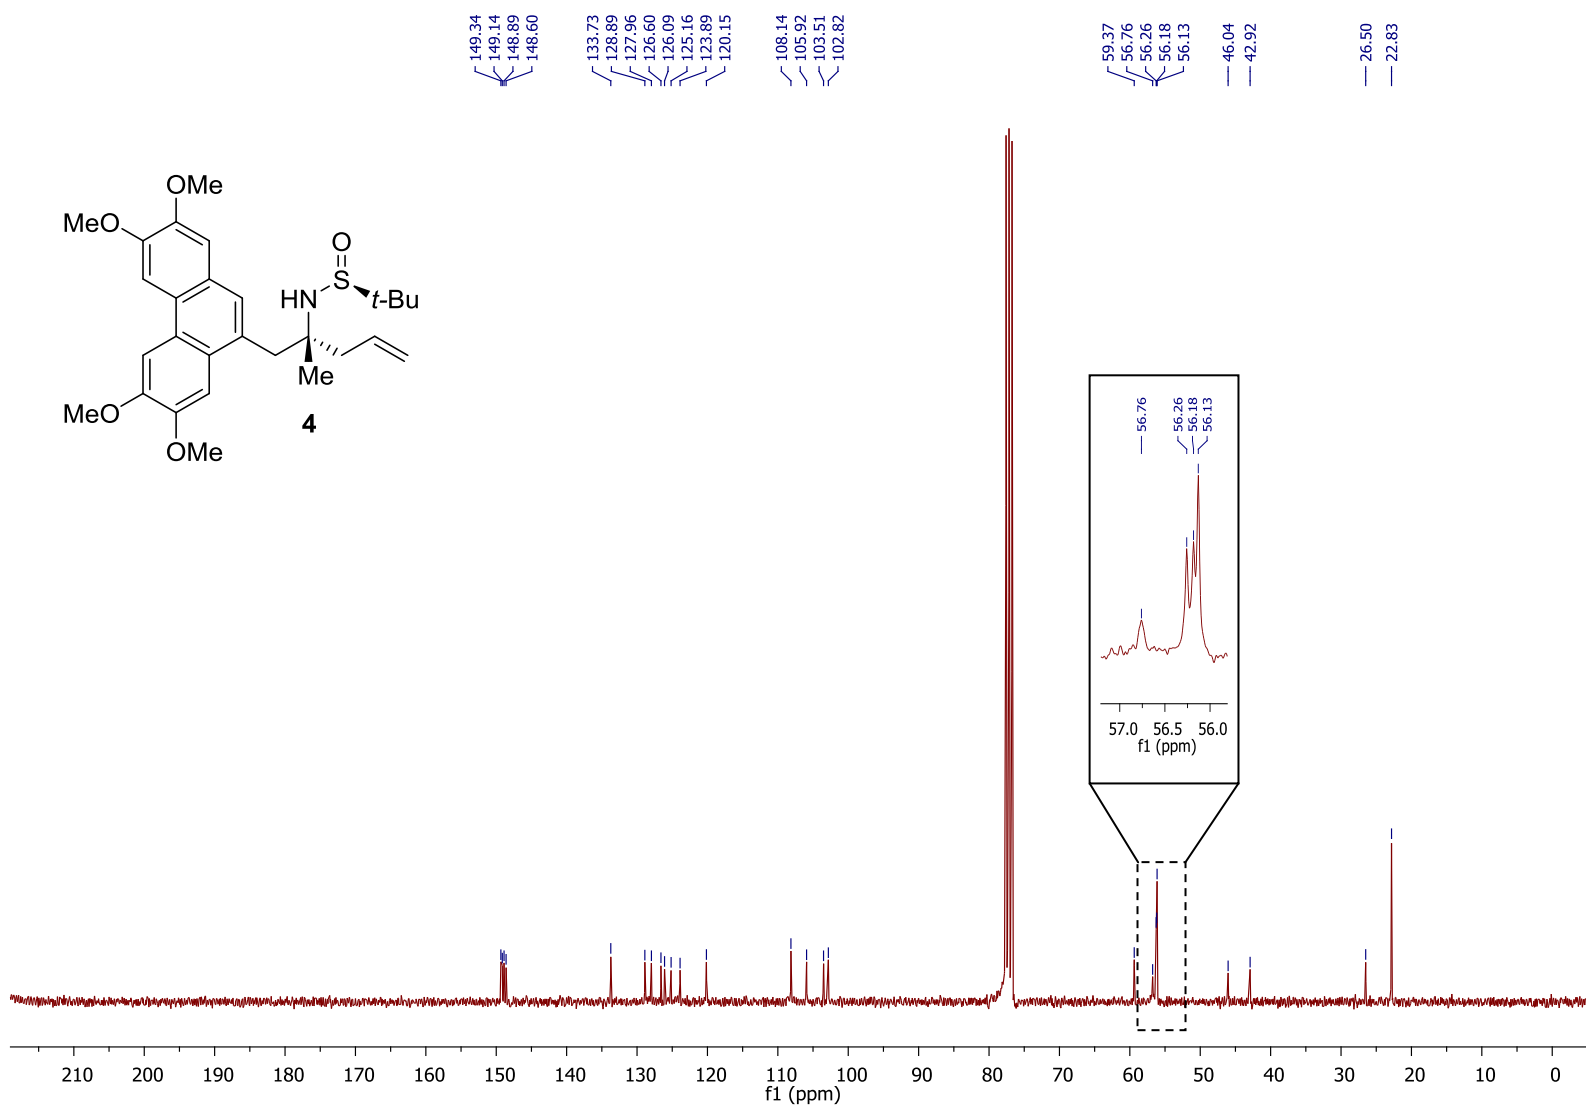

<sup>1</sup>H NMR (300 MHz, CDCl<sub>3</sub>)

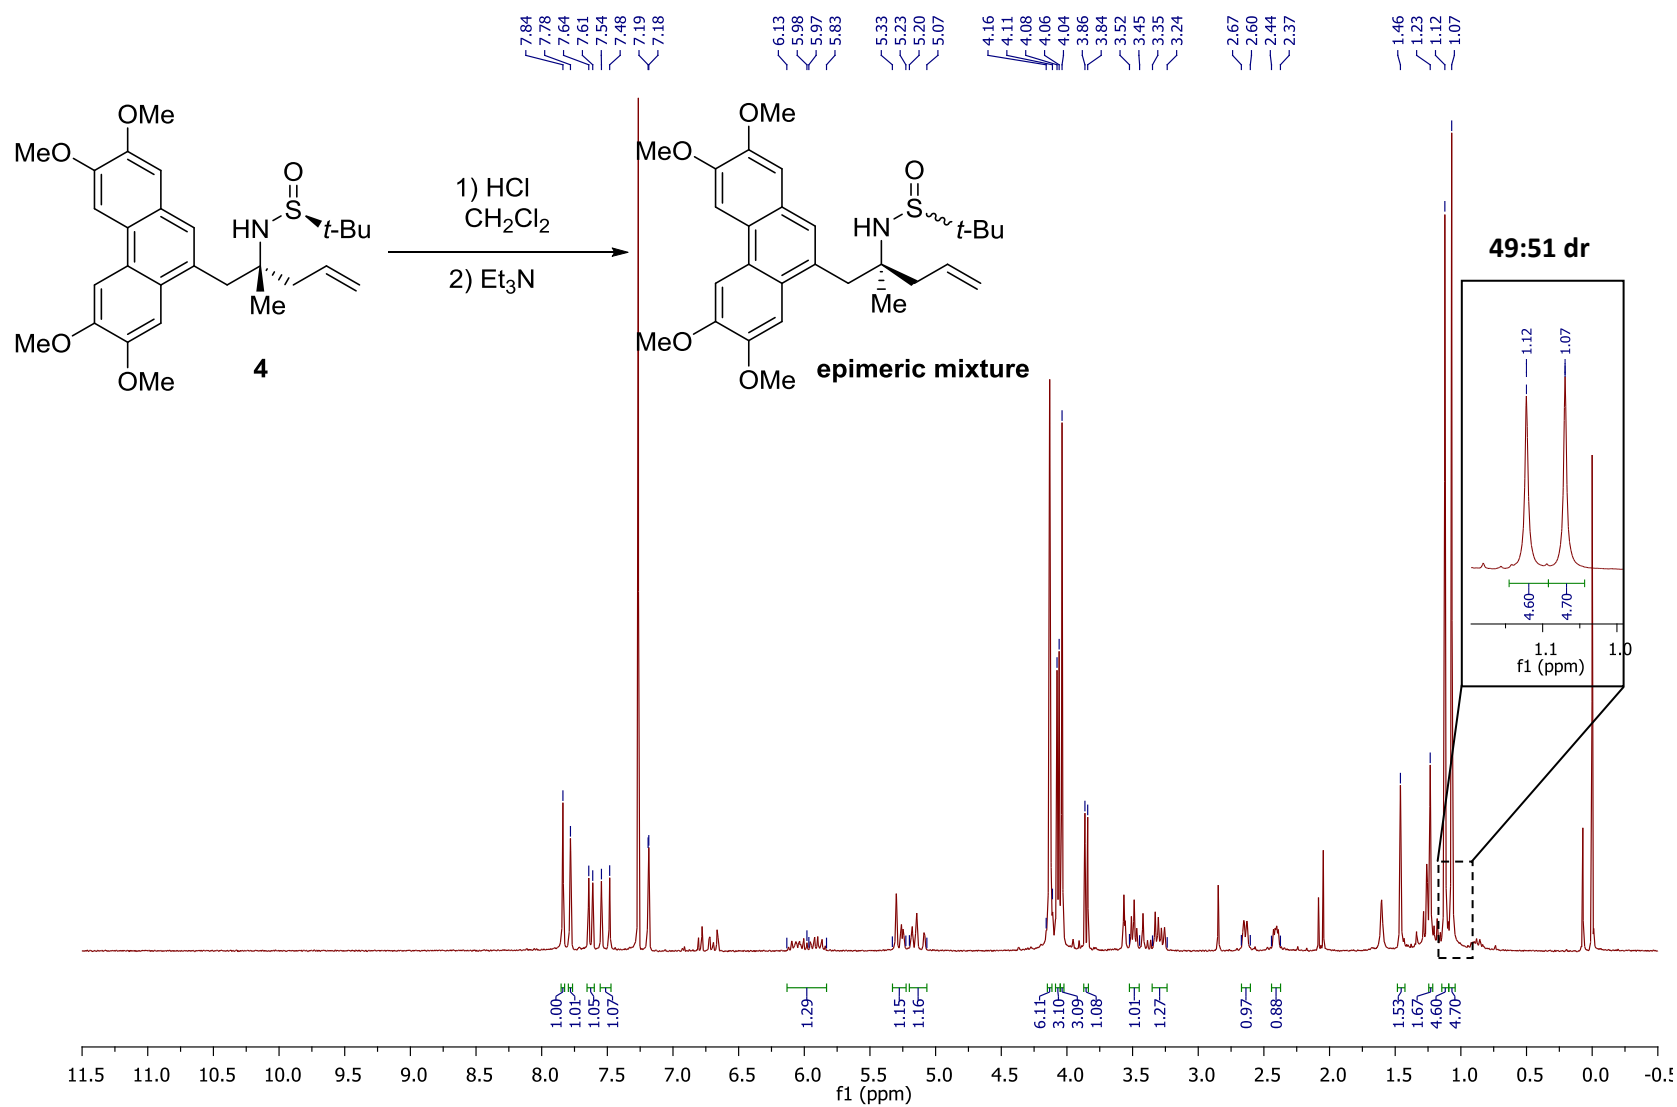



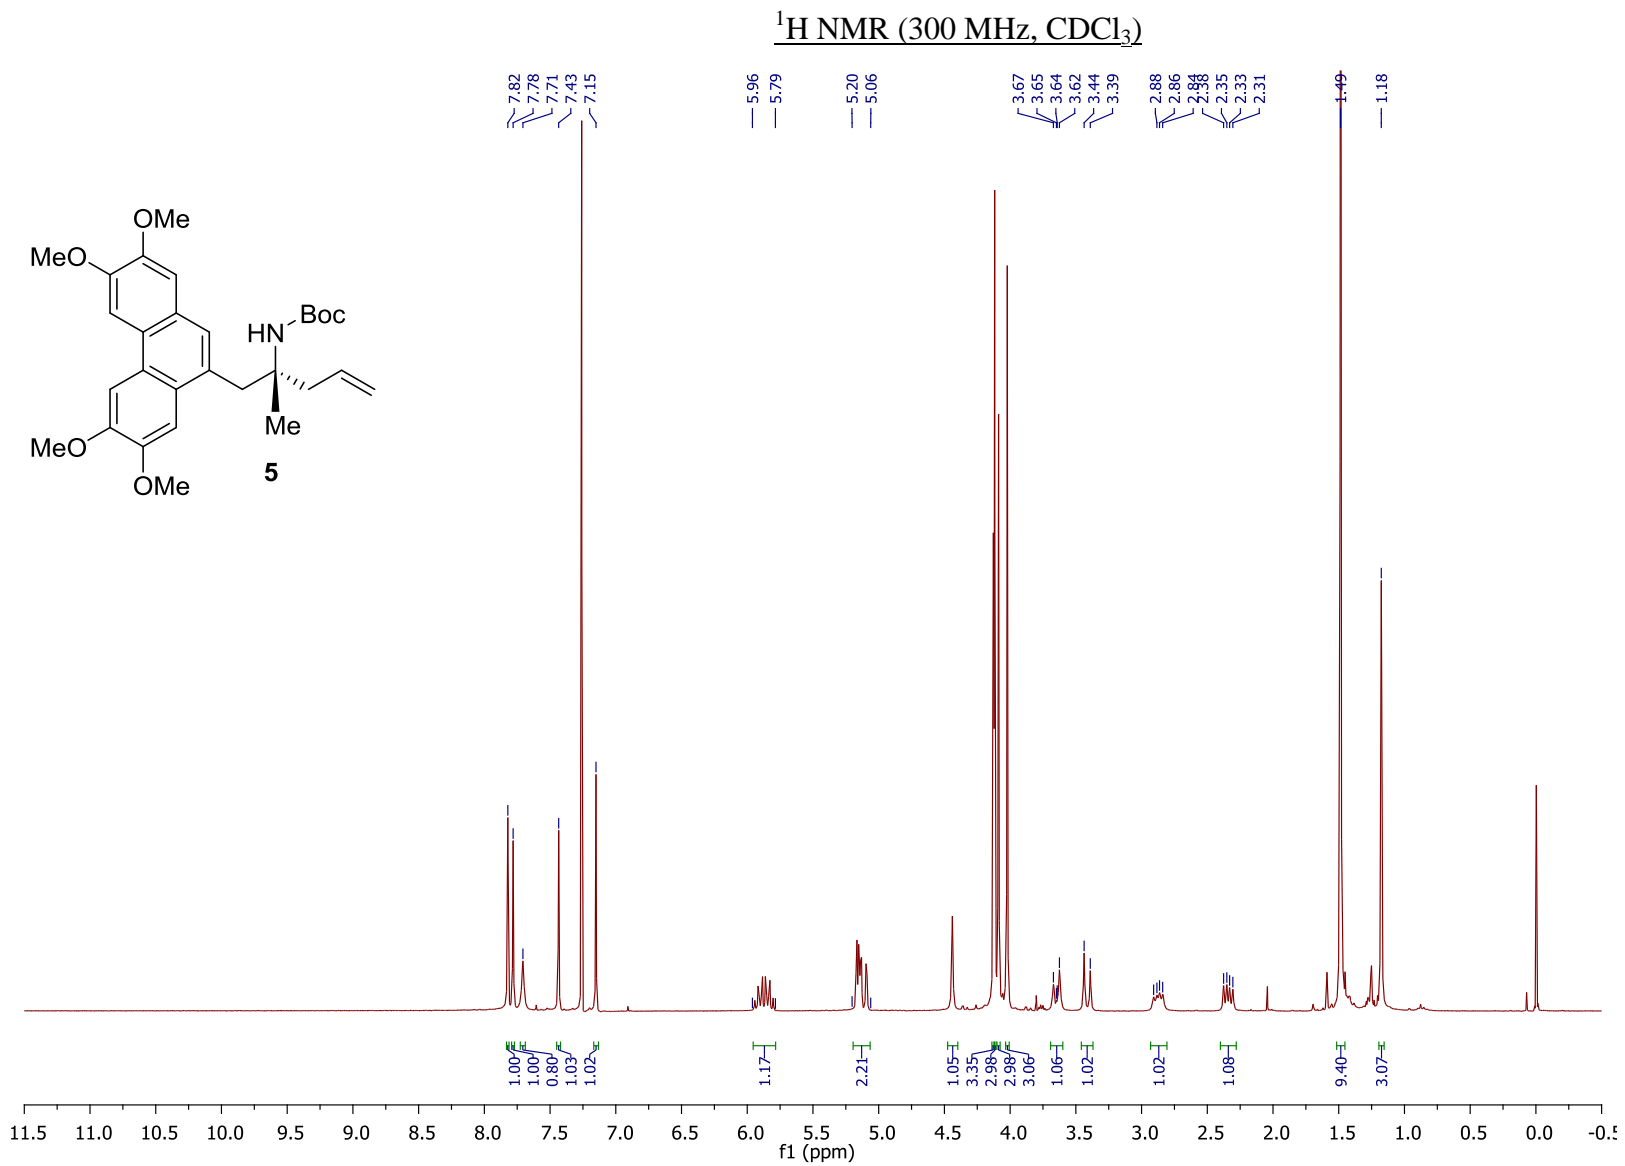

<sup>13</sup>C NMR (75 MHz, CDCl<sub>3</sub>)

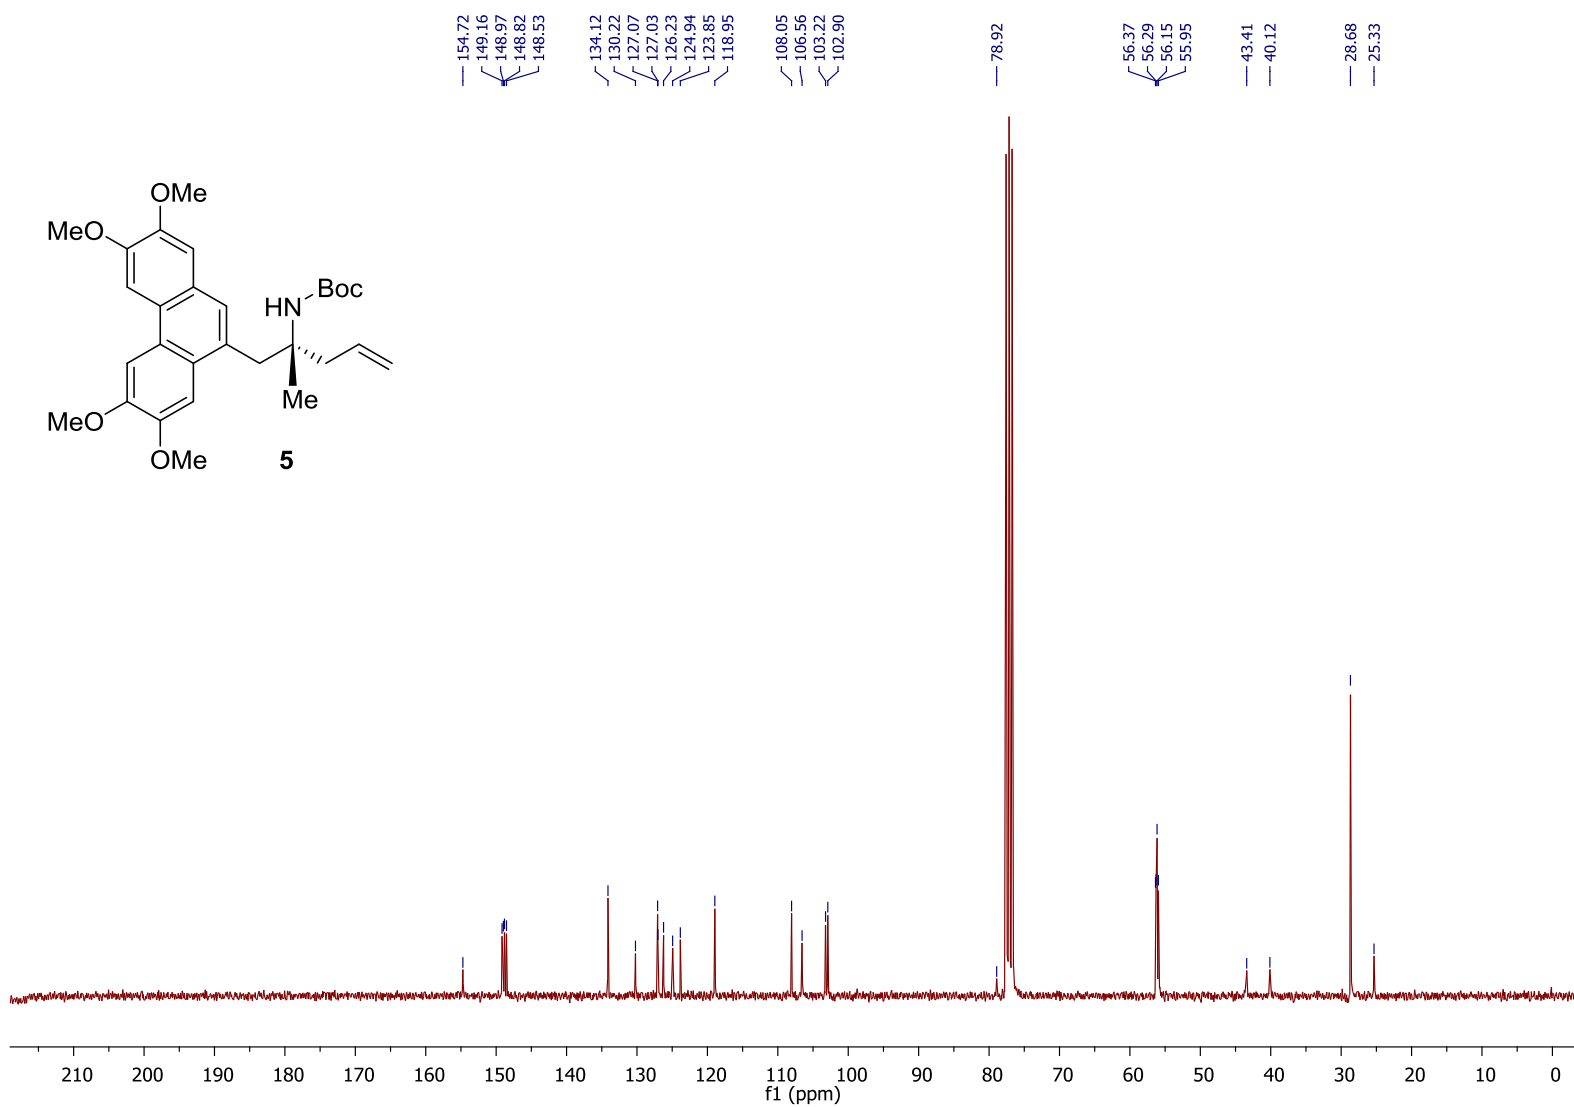

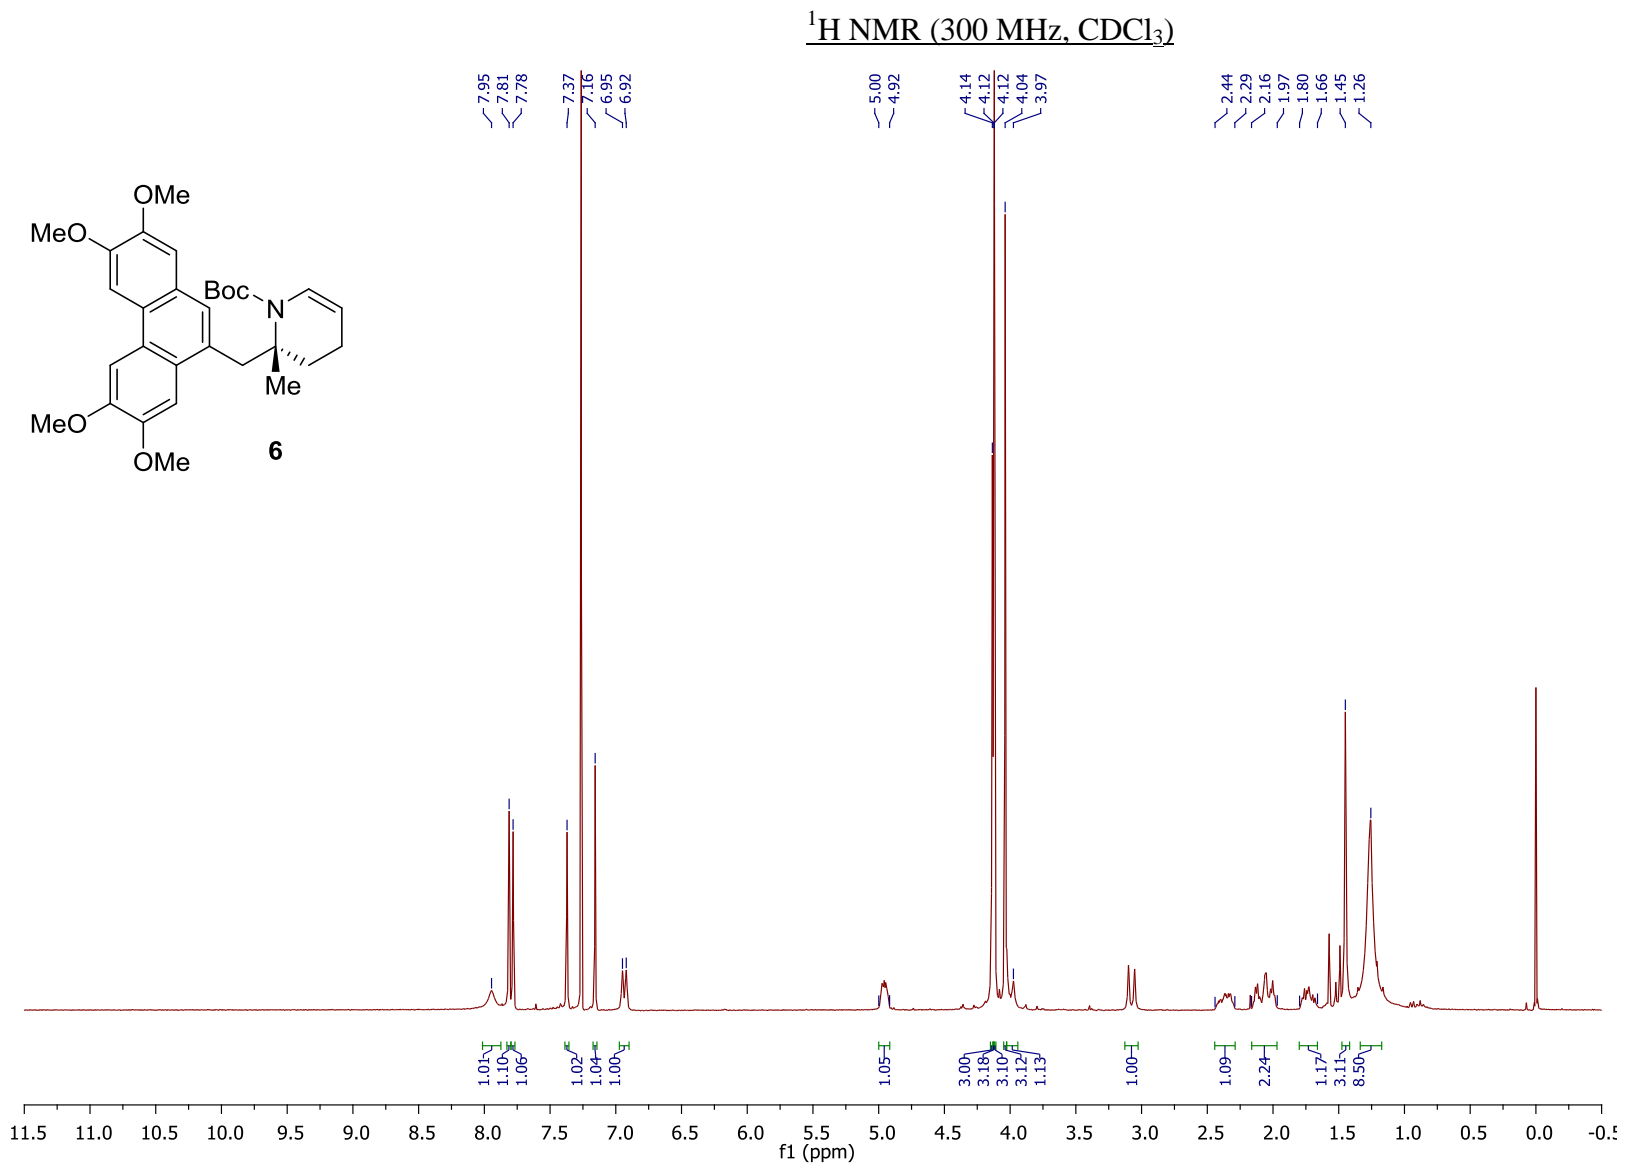

<sup>13</sup>C NMR (75 MHz, CDCl<sub>3</sub>)

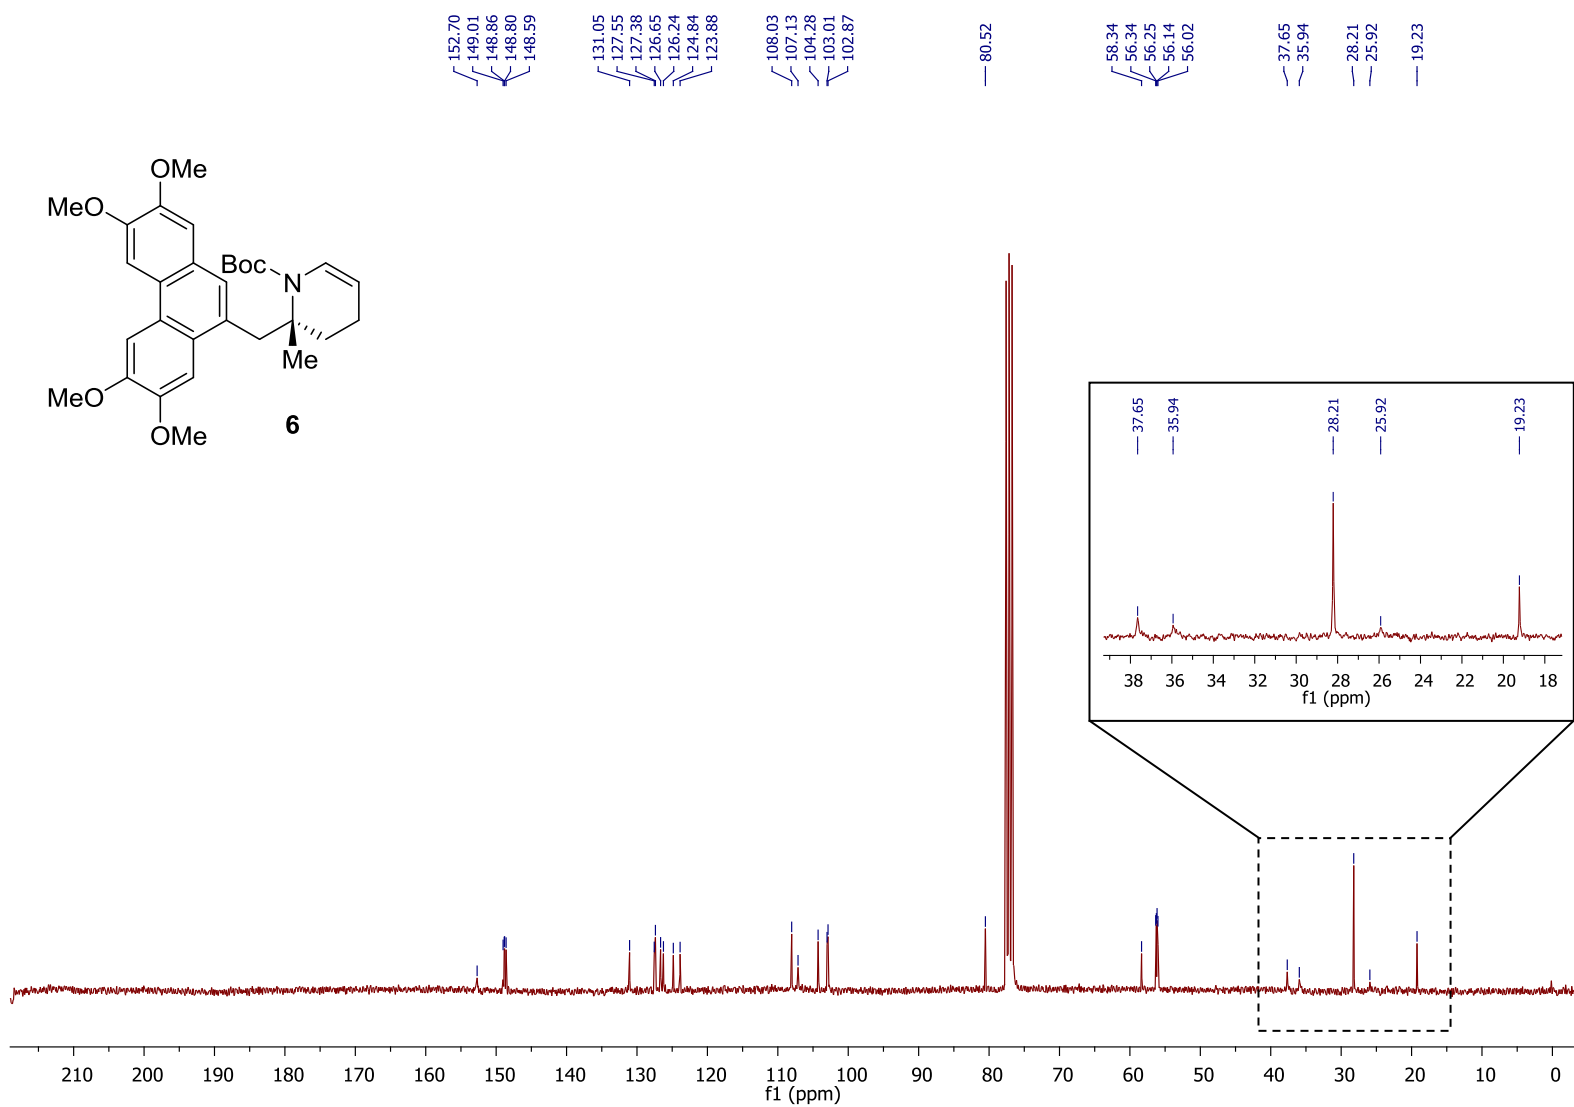

<sup>1</sup>H NMR (300 MHz, CDCl<sub>3</sub>)

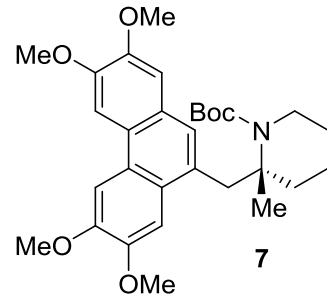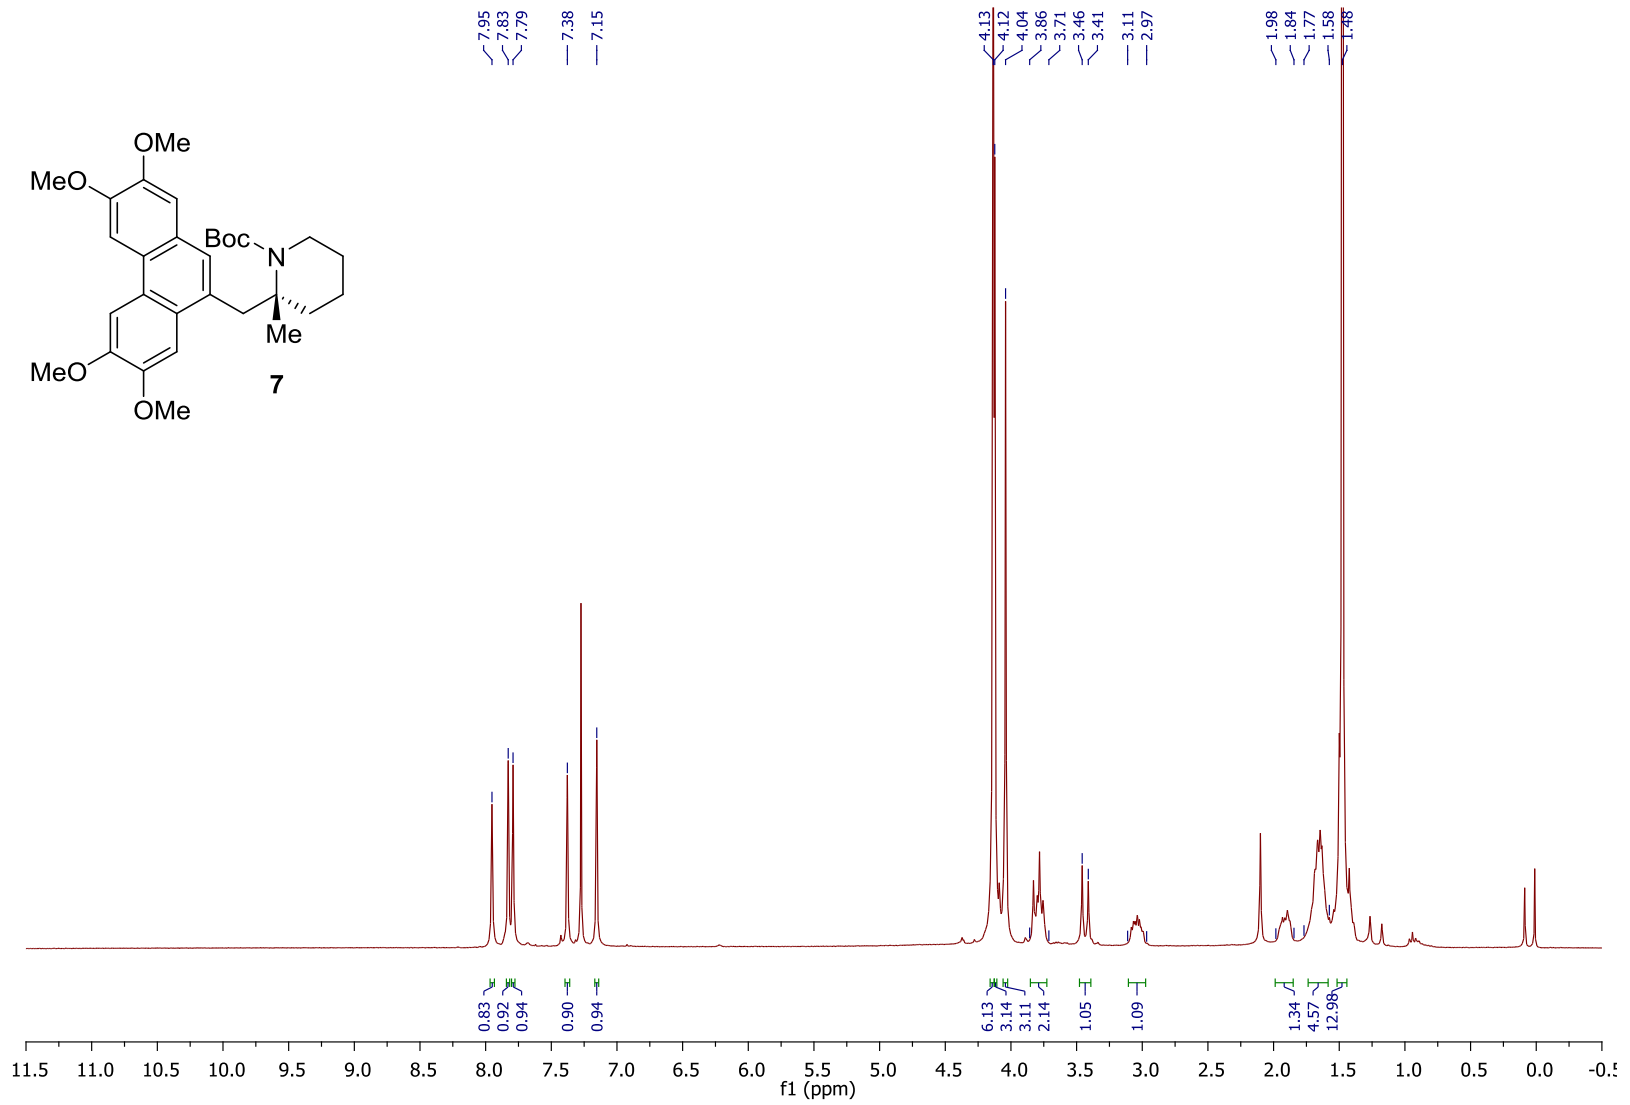

$^{13}\text{C}$  NMR (75 MHz,  $\text{CDCl}_3$ )

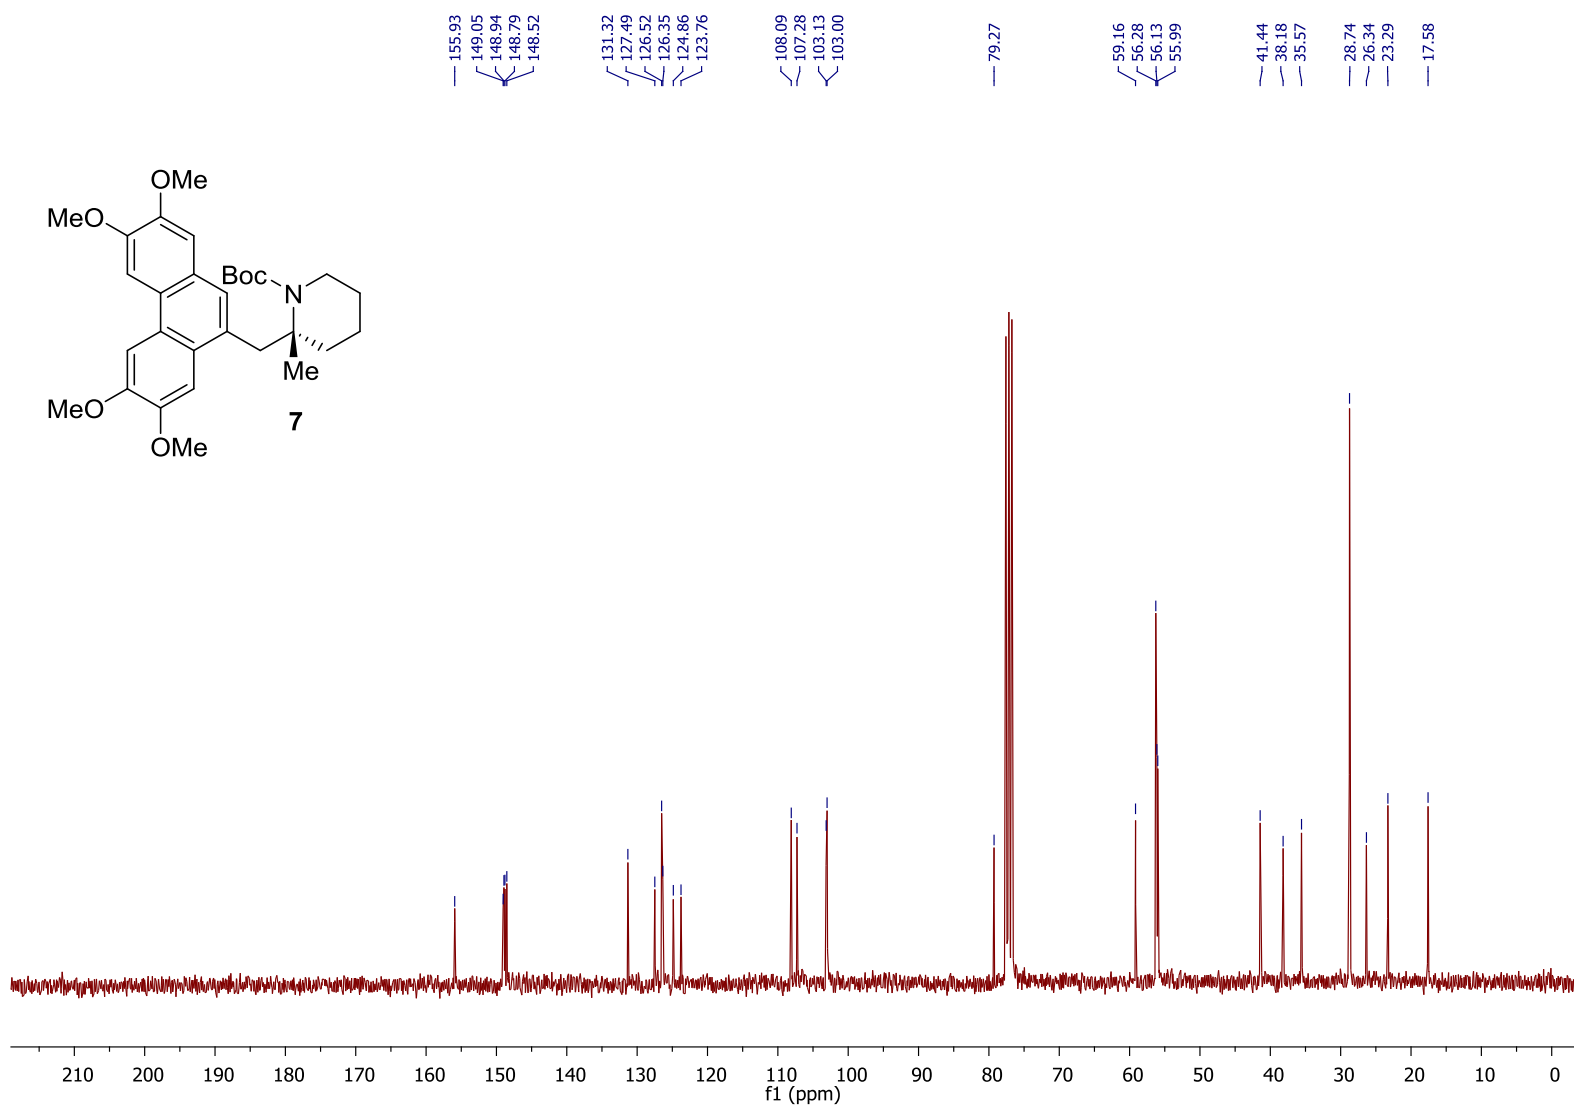

$^1\text{H}$  NMR (300 MHz,  $\text{CDCl}_3$ )

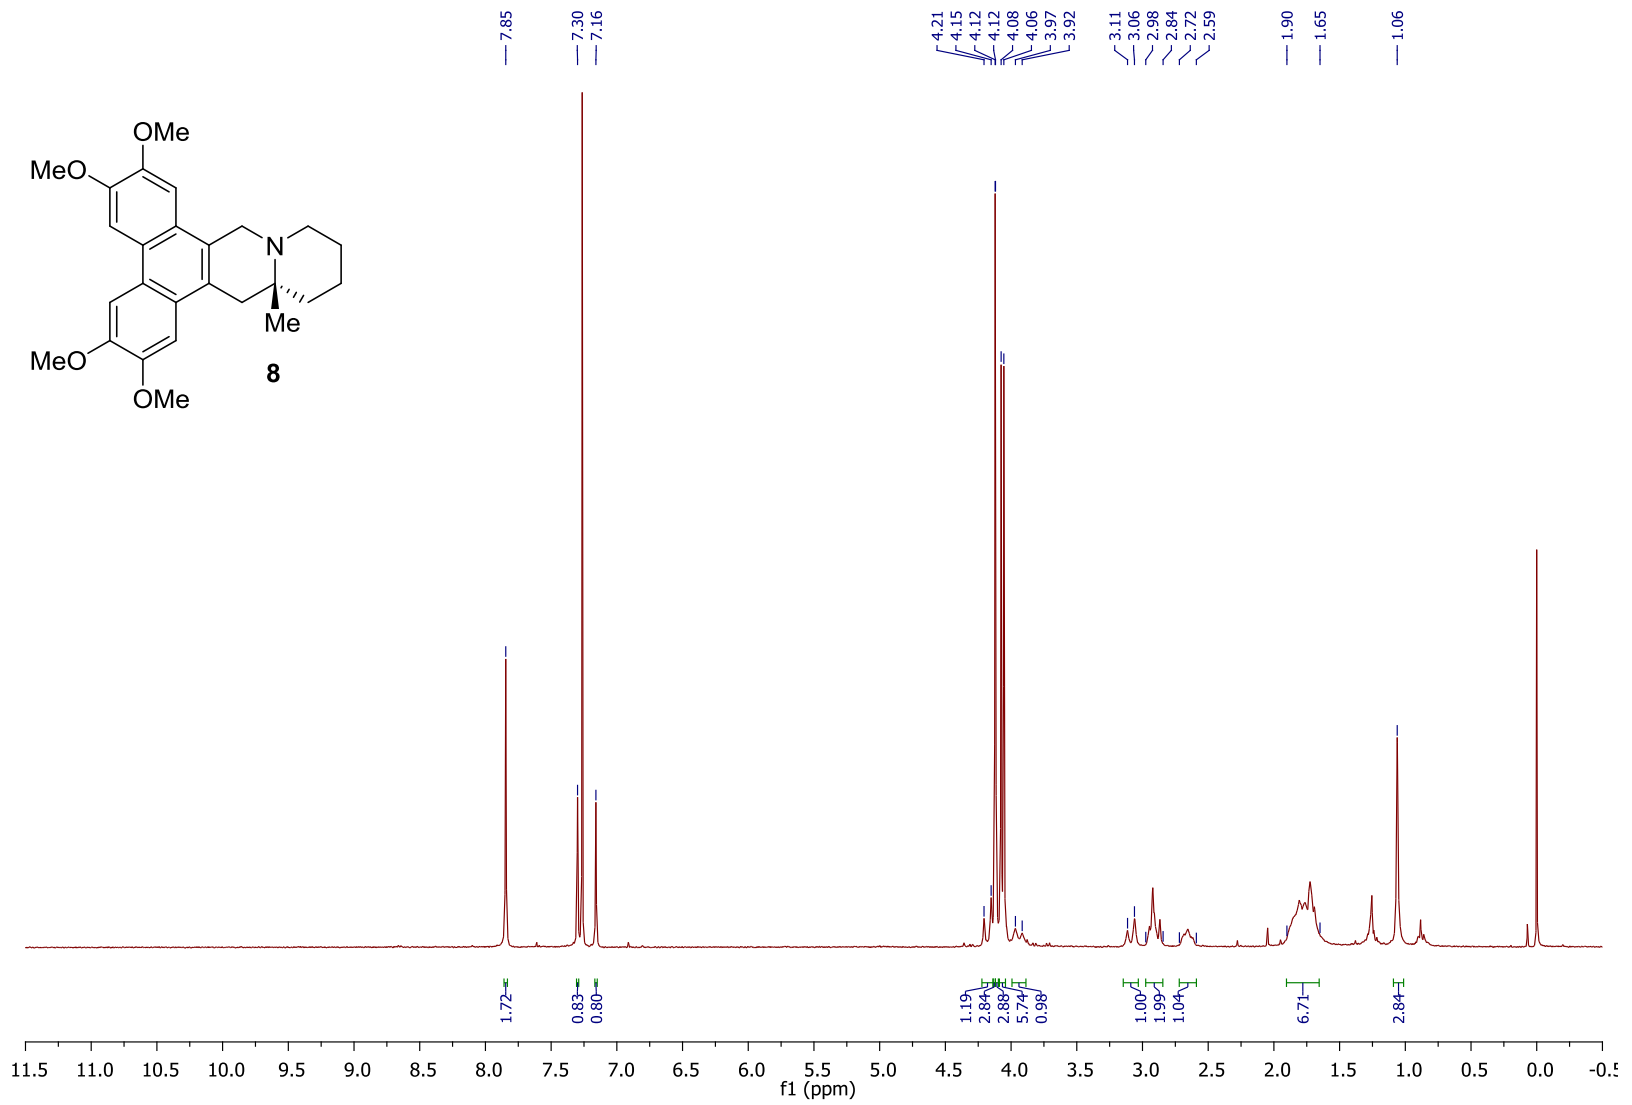

$^{13}\text{C}$  NMR (75 MHz,  $\text{CDCl}_3$ )

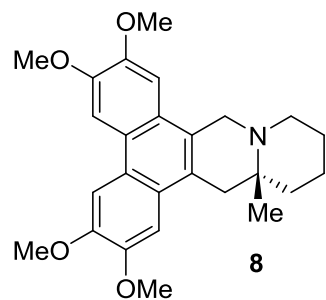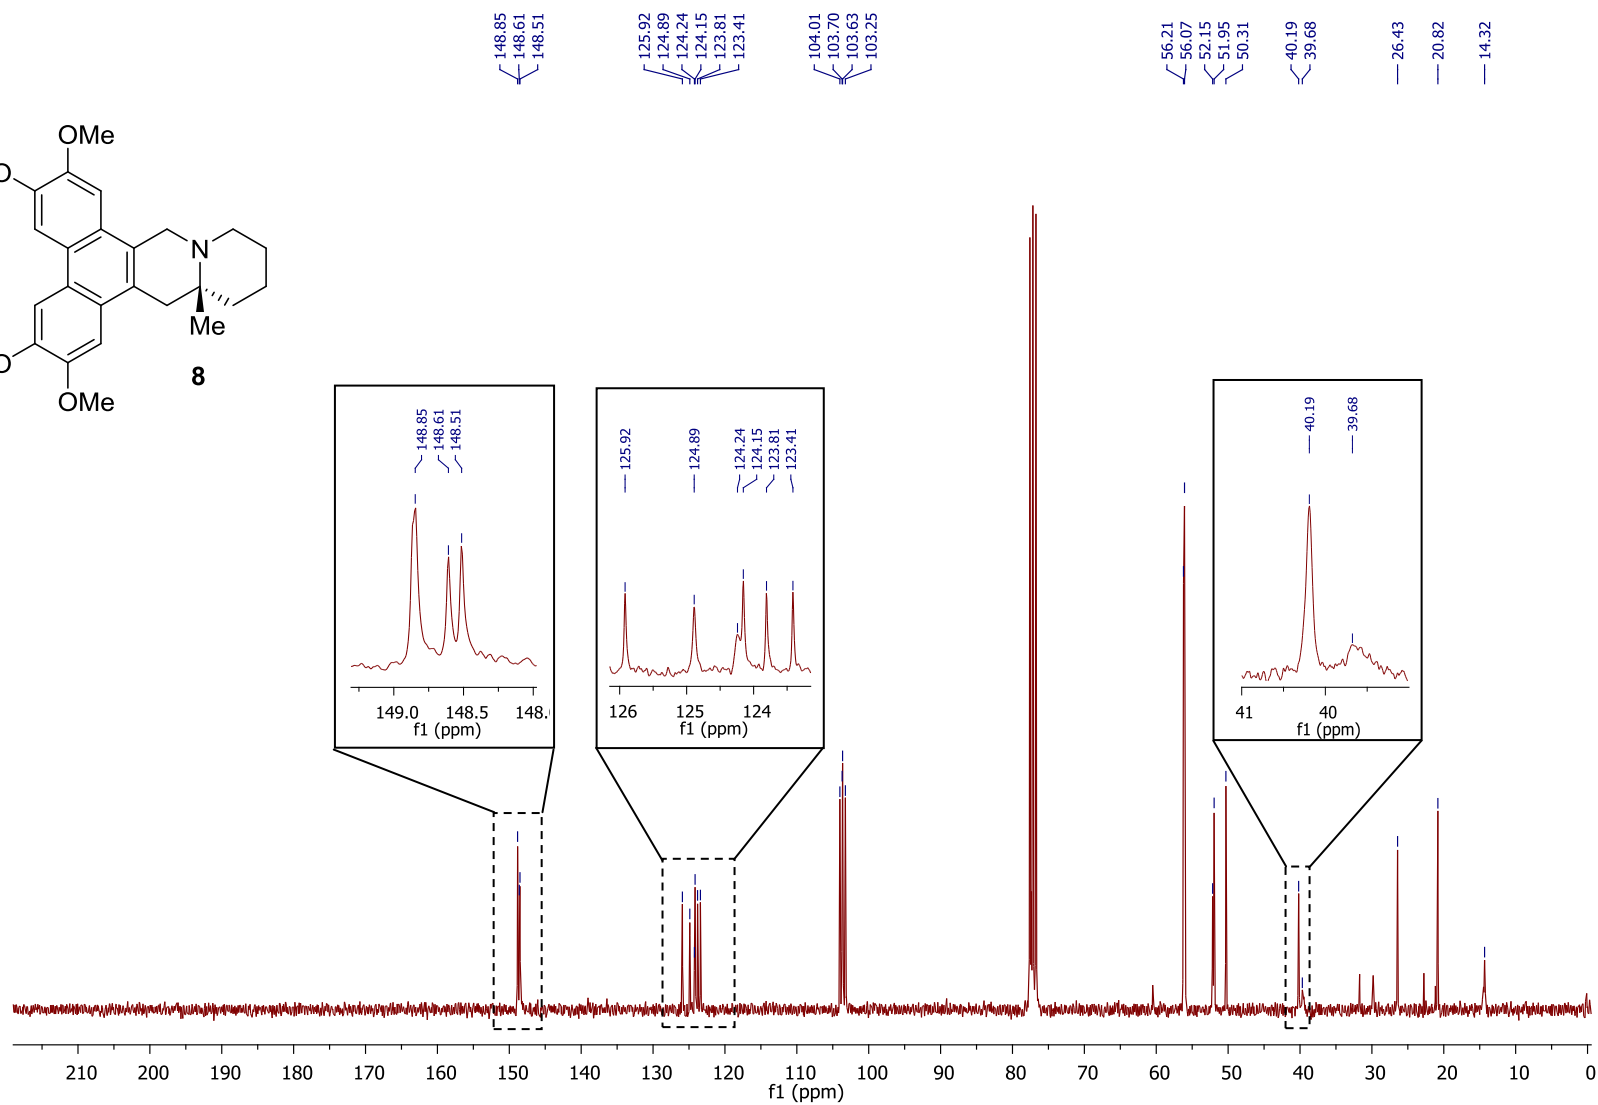



COSY (300 MHz, CDCl<sub>3</sub>)

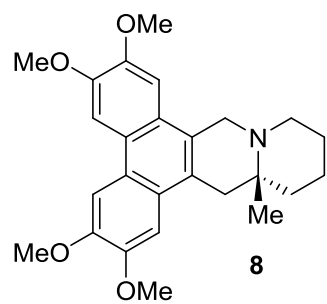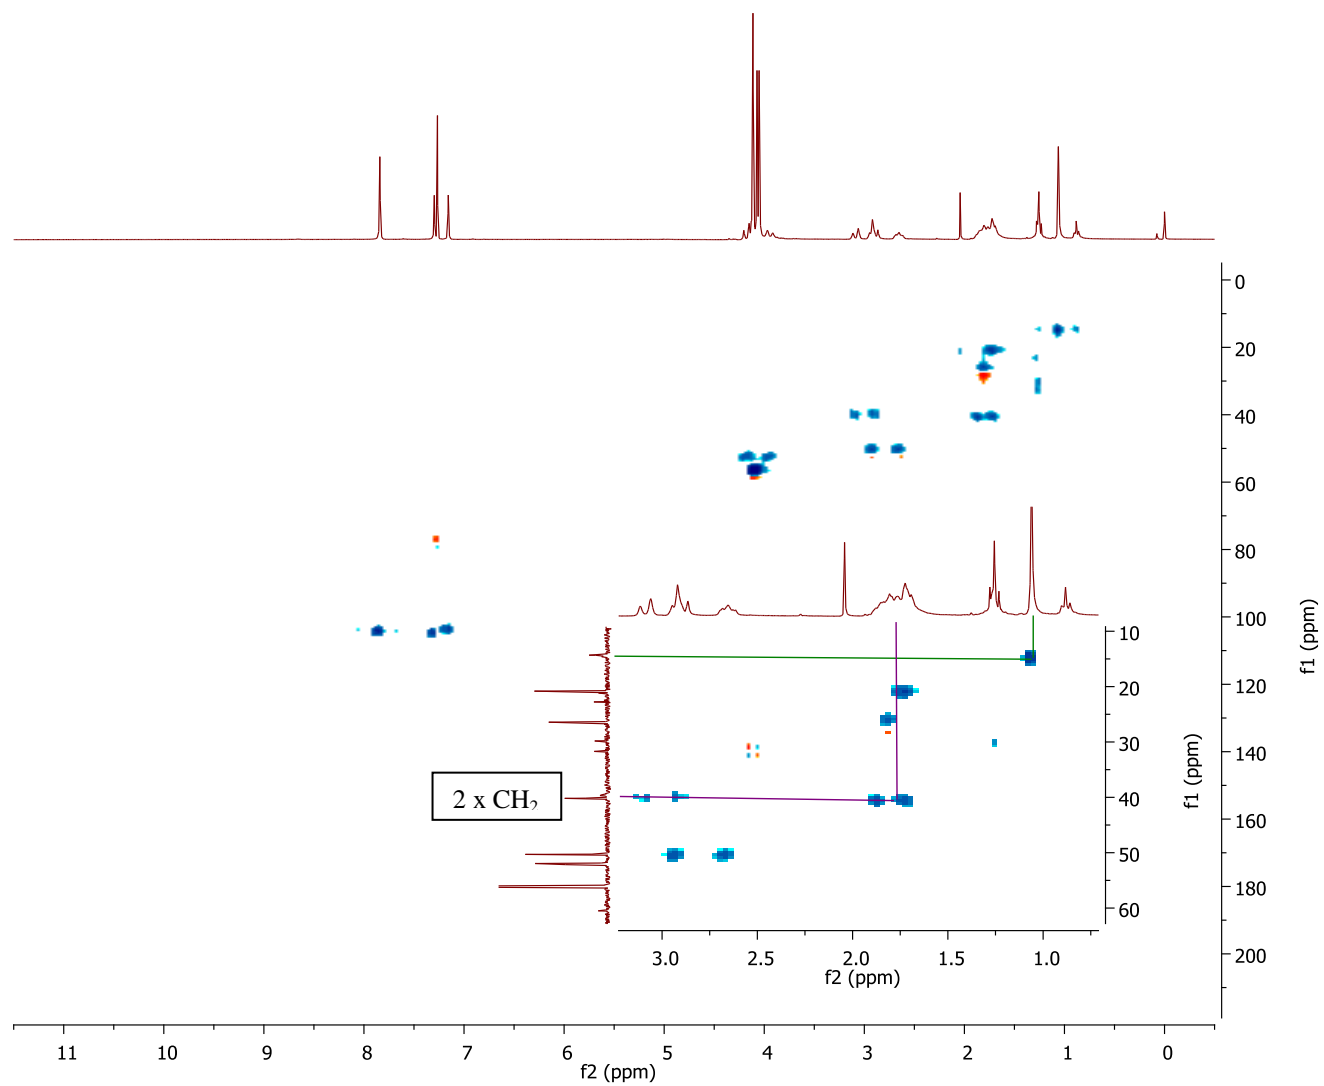

### HPLC traces of compounds *rac-8* and *ent-8* / **8**

CHIRALPAK IB column 4.6 mm x 250 mL; isocratic elution with 75:25:0.3, *n*-hexane/*i*-PrOH/TEA, 1.0 mL·min<sup>-1</sup>; UV detection at 254 nm.

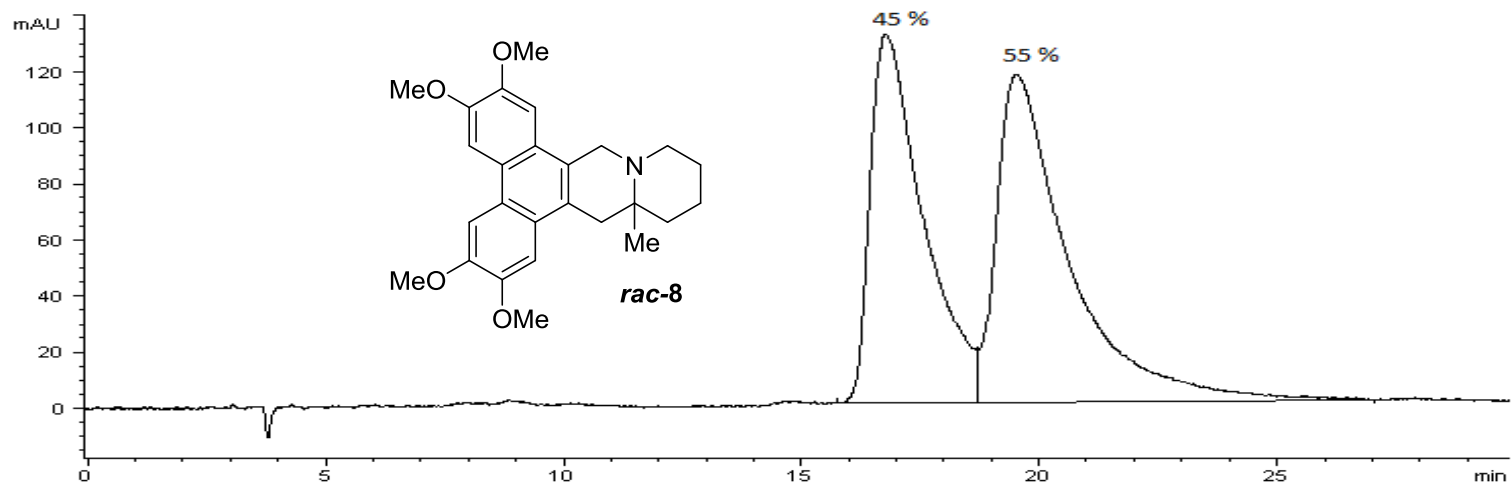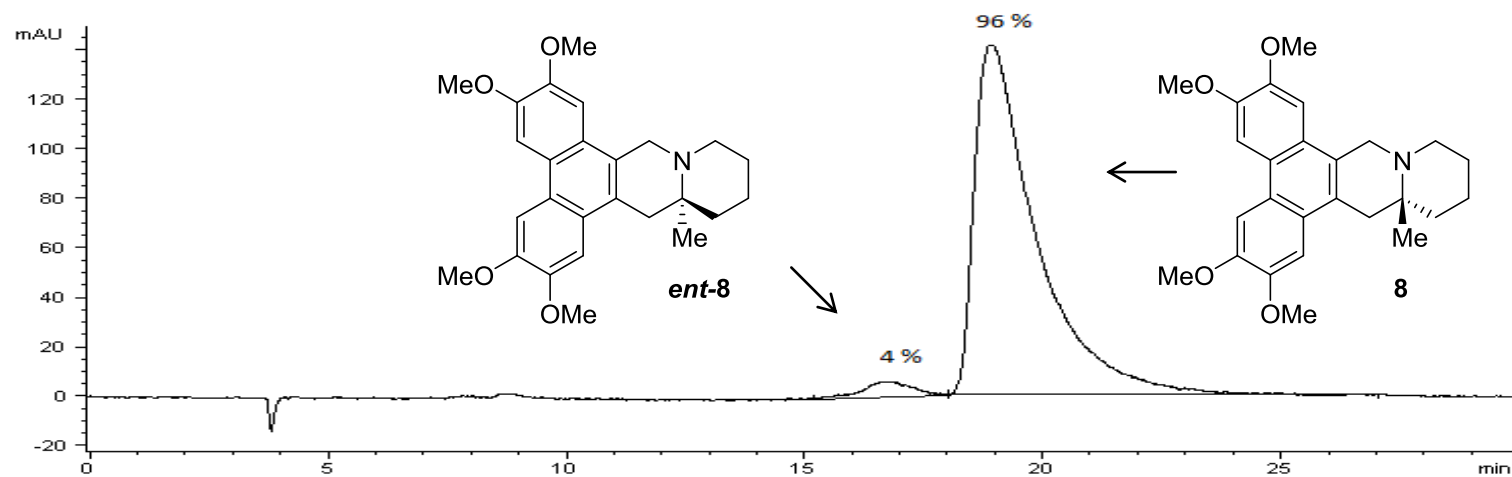

$^1\text{H NMR}$  (300 MHz,  $\text{CDCl}_3$ )

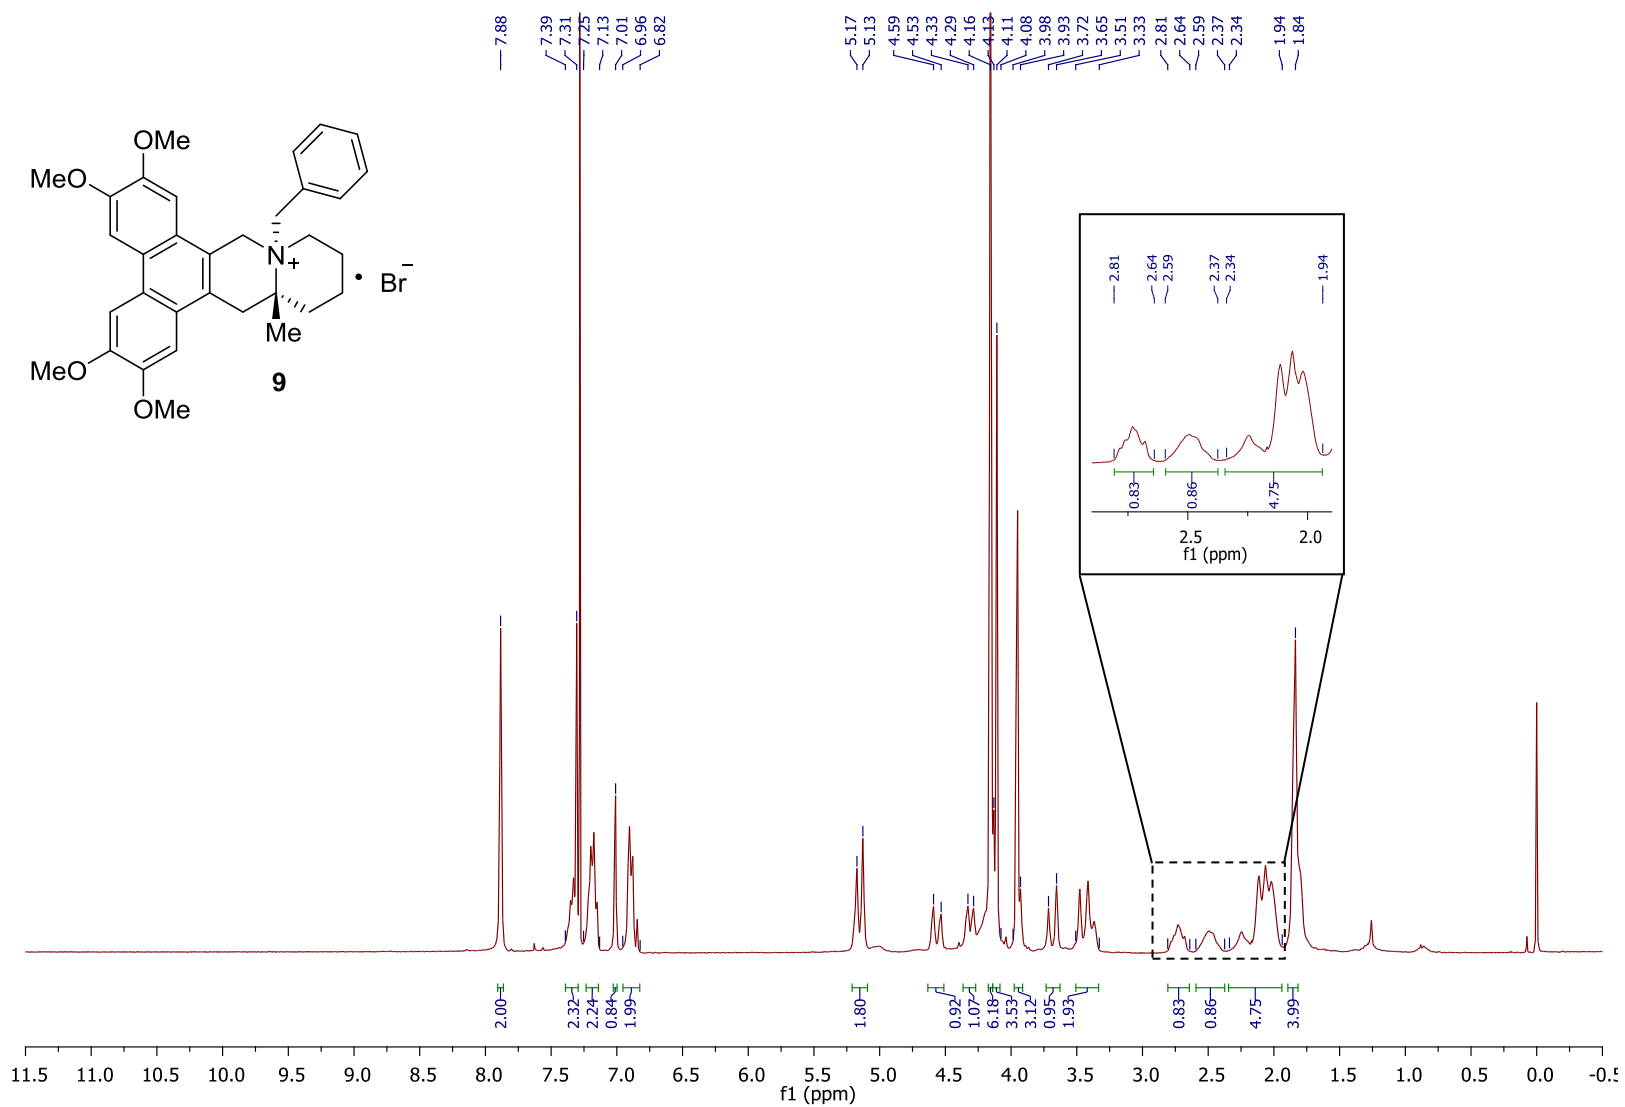

$^{13}\text{C}$  NMR (75 MHz,  $\text{CDCl}_3$ )

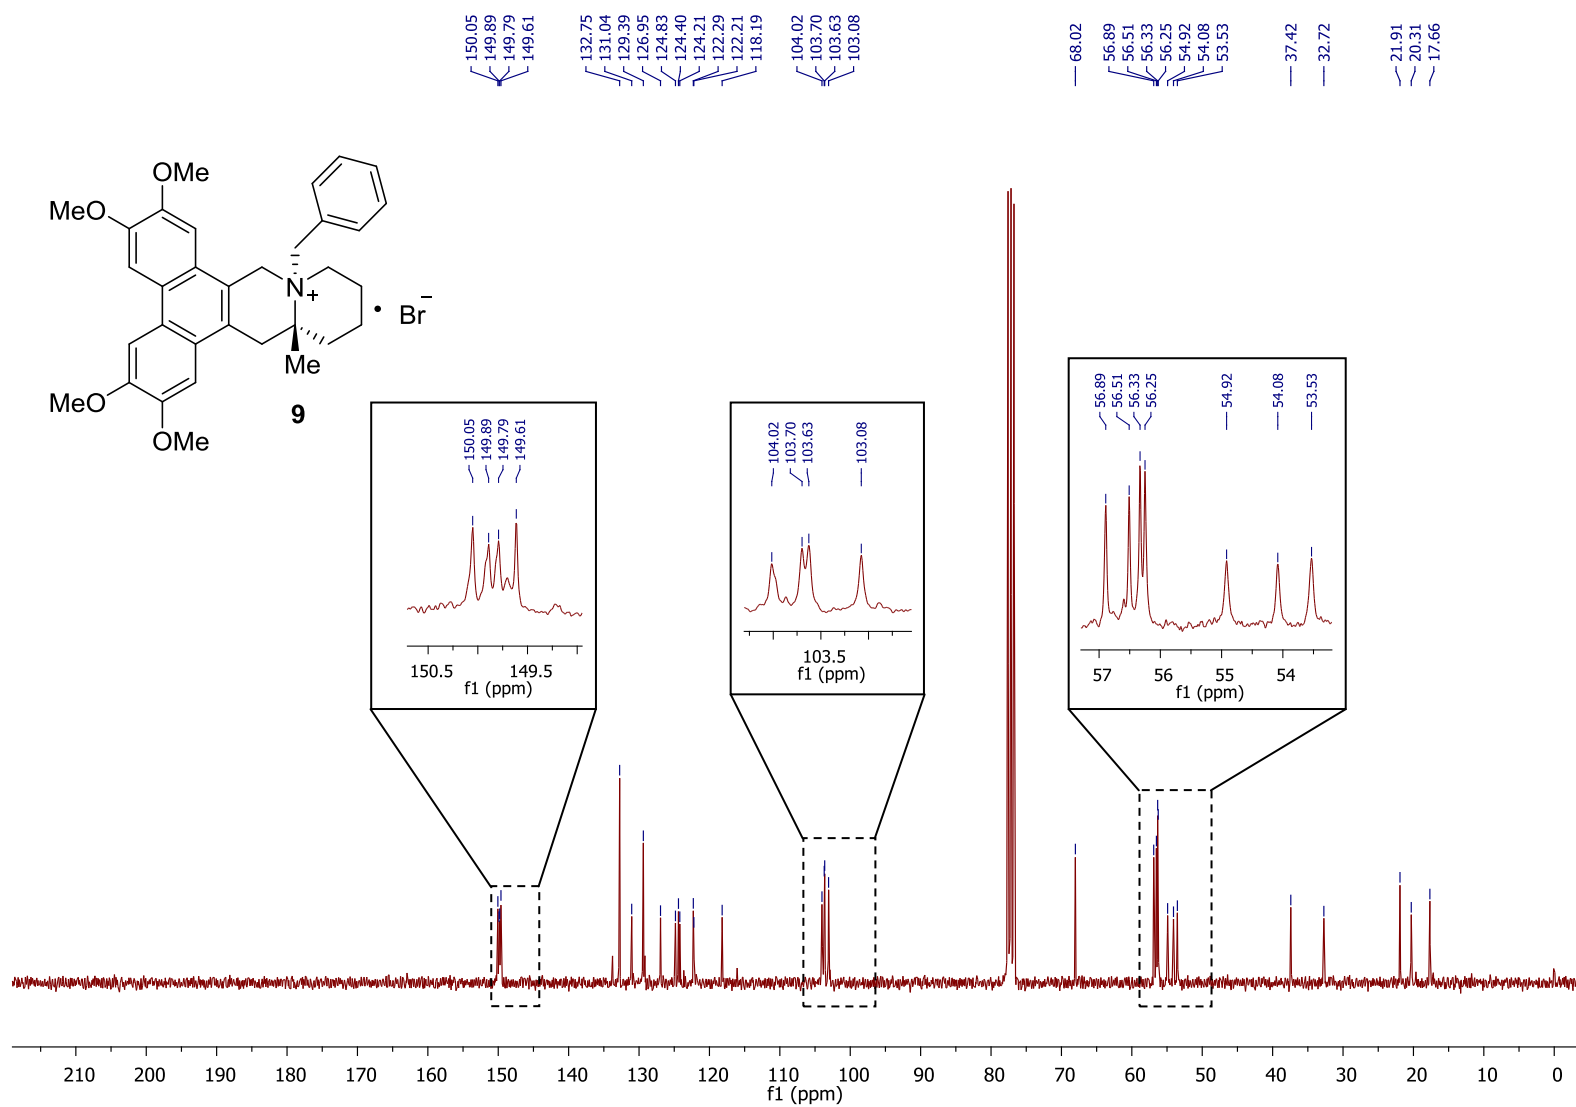

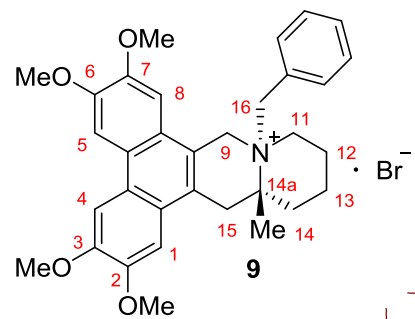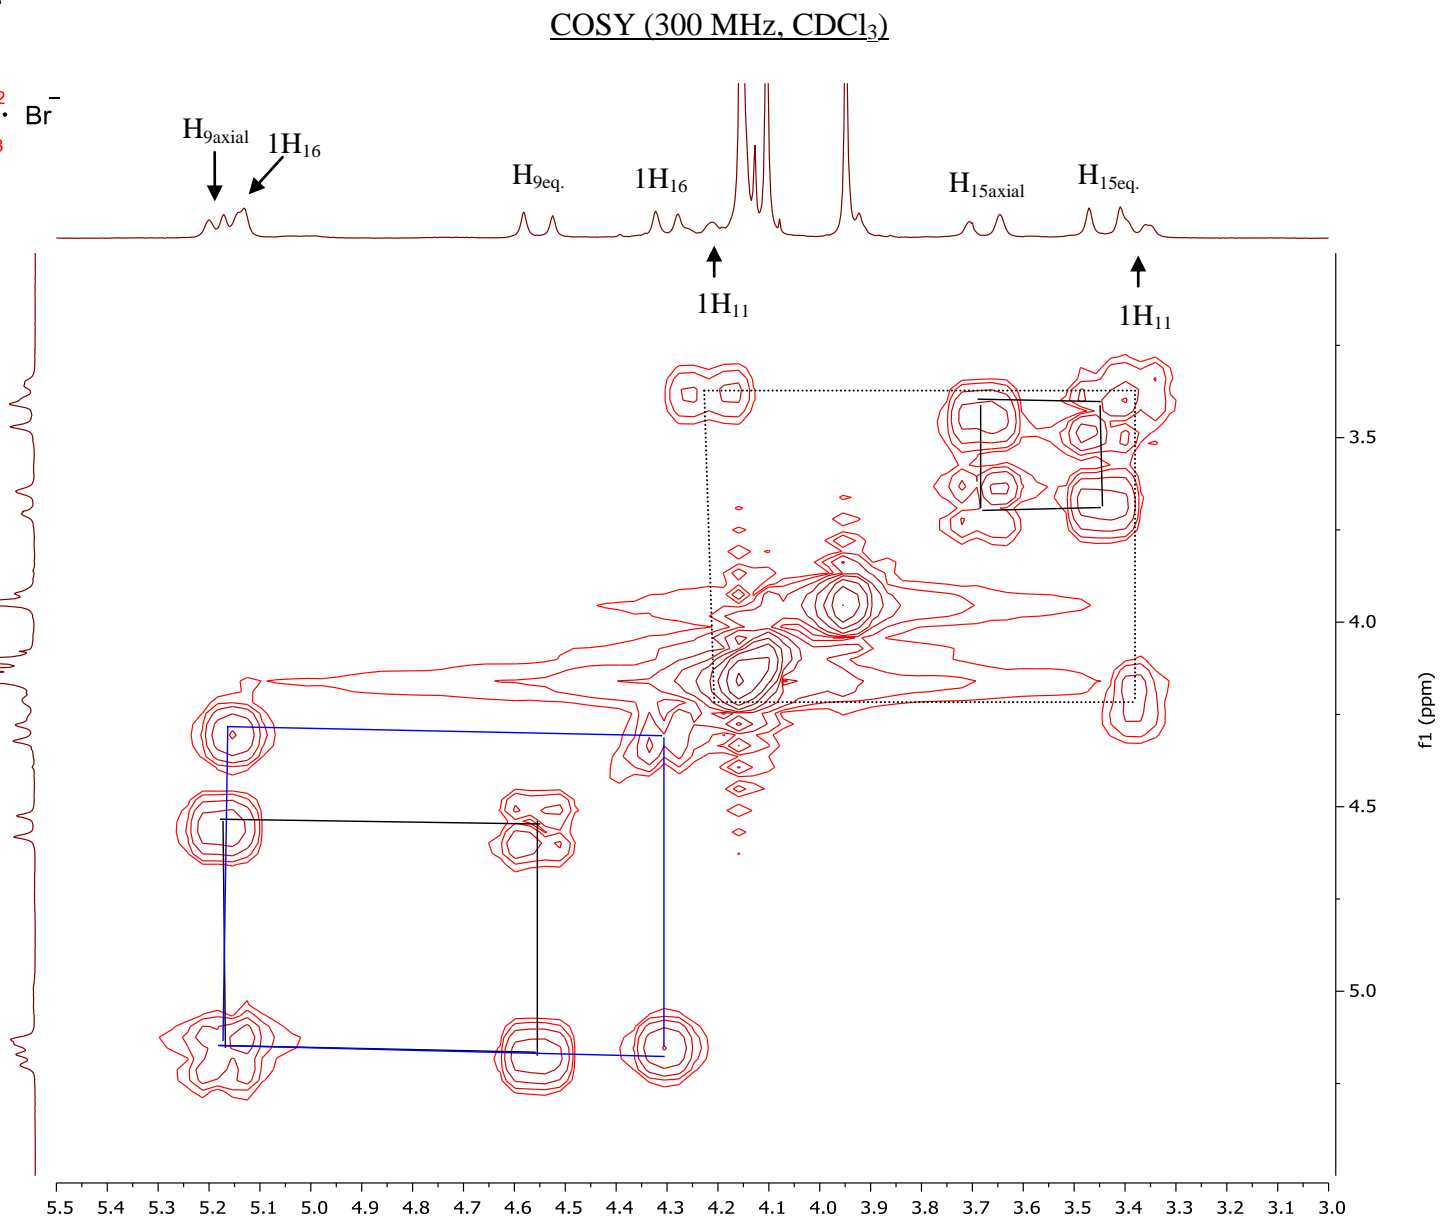

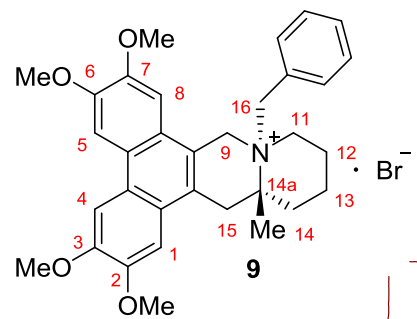

NOESY (300 MHz, CDCl<sub>3</sub>)

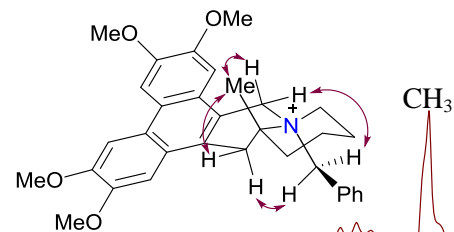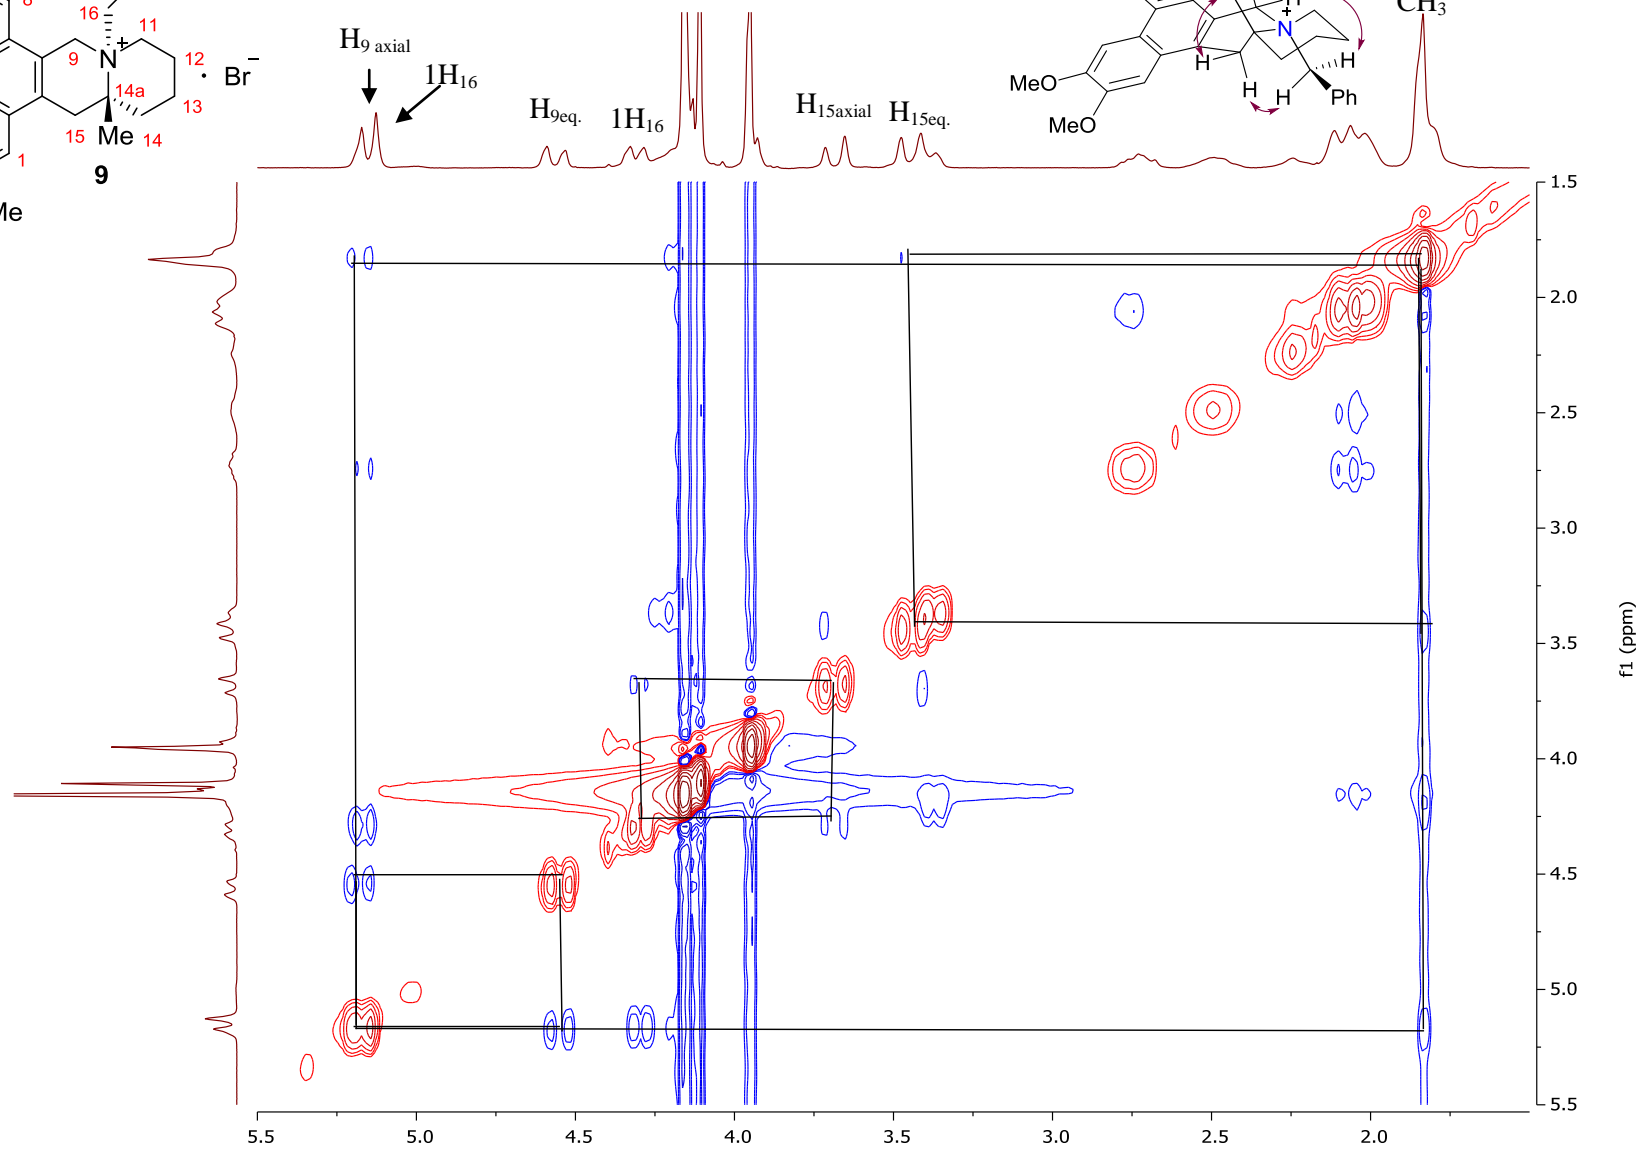

$^1\text{H NMR}$  (300 MHz,  $\text{CDCl}_3$ )

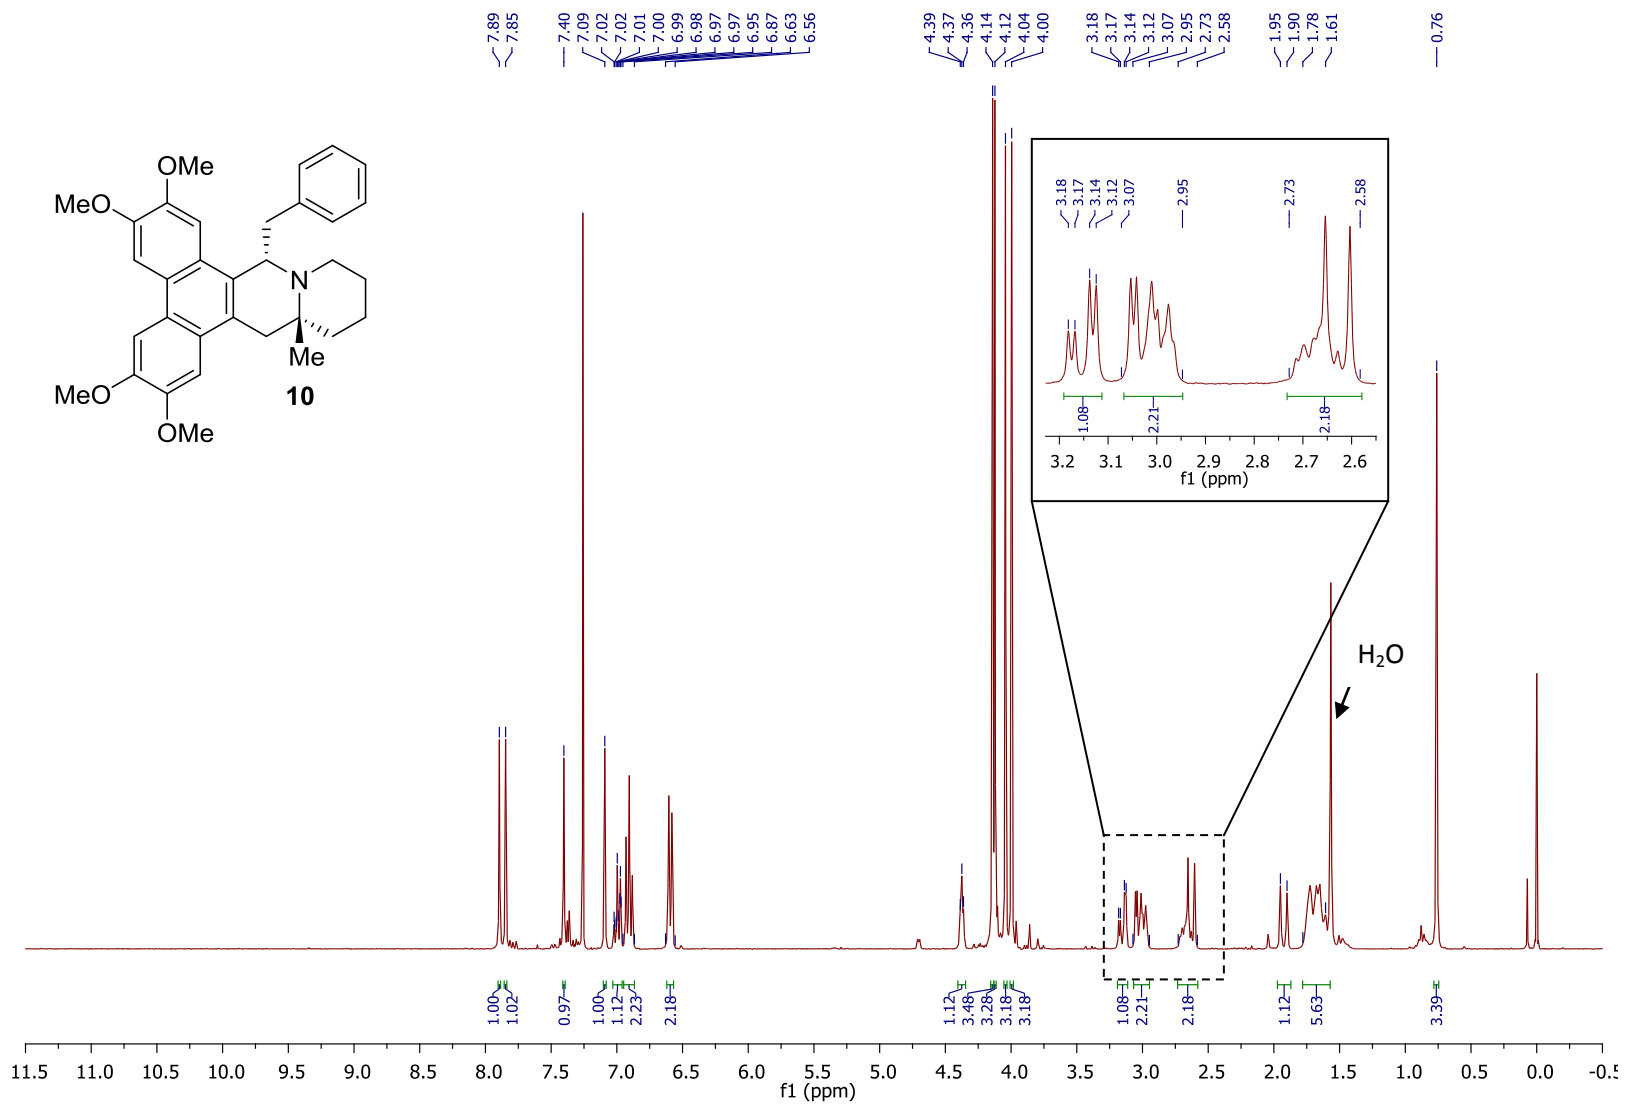

$^{13}\text{C}$  NMR (75 MHz,  $\text{CDCl}_3$ )

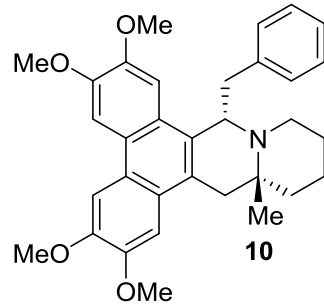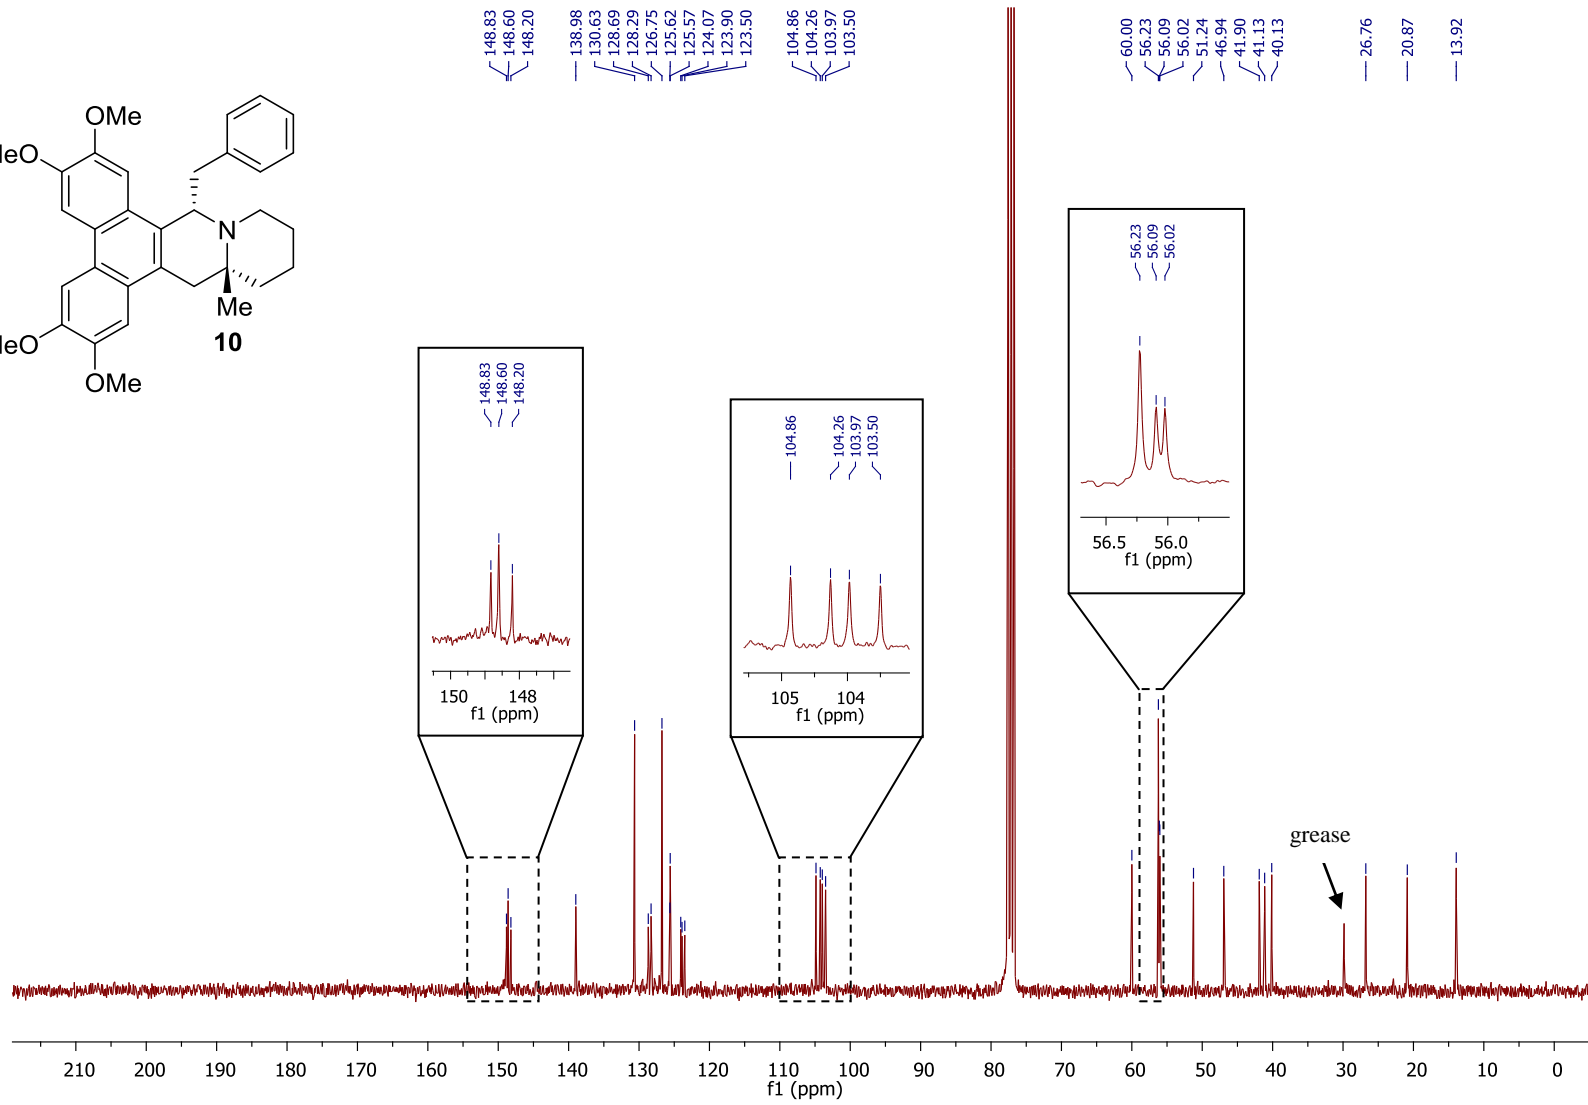



COSY (300 MHz, CDCl<sub>3</sub>)

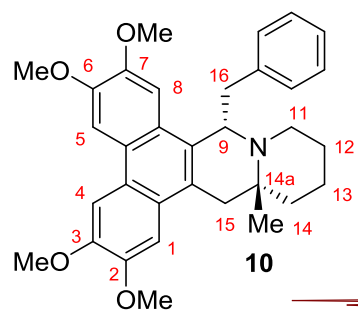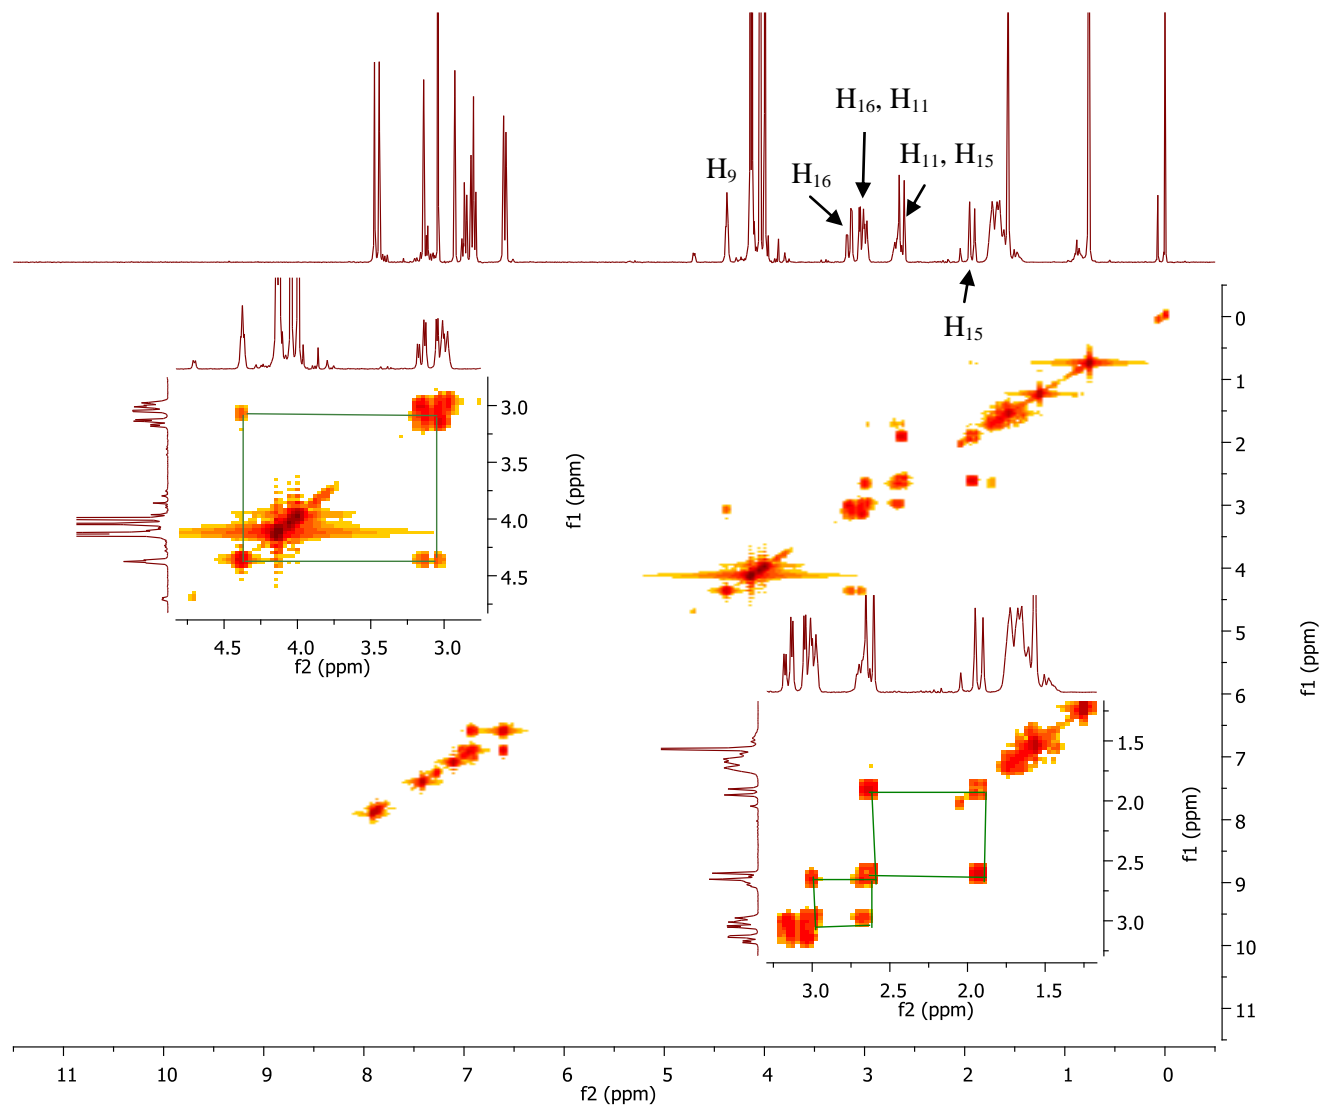

DPFGSE-NOE when H<sub>9</sub> is irradiated (300 MHz, CDCl<sub>3</sub>)

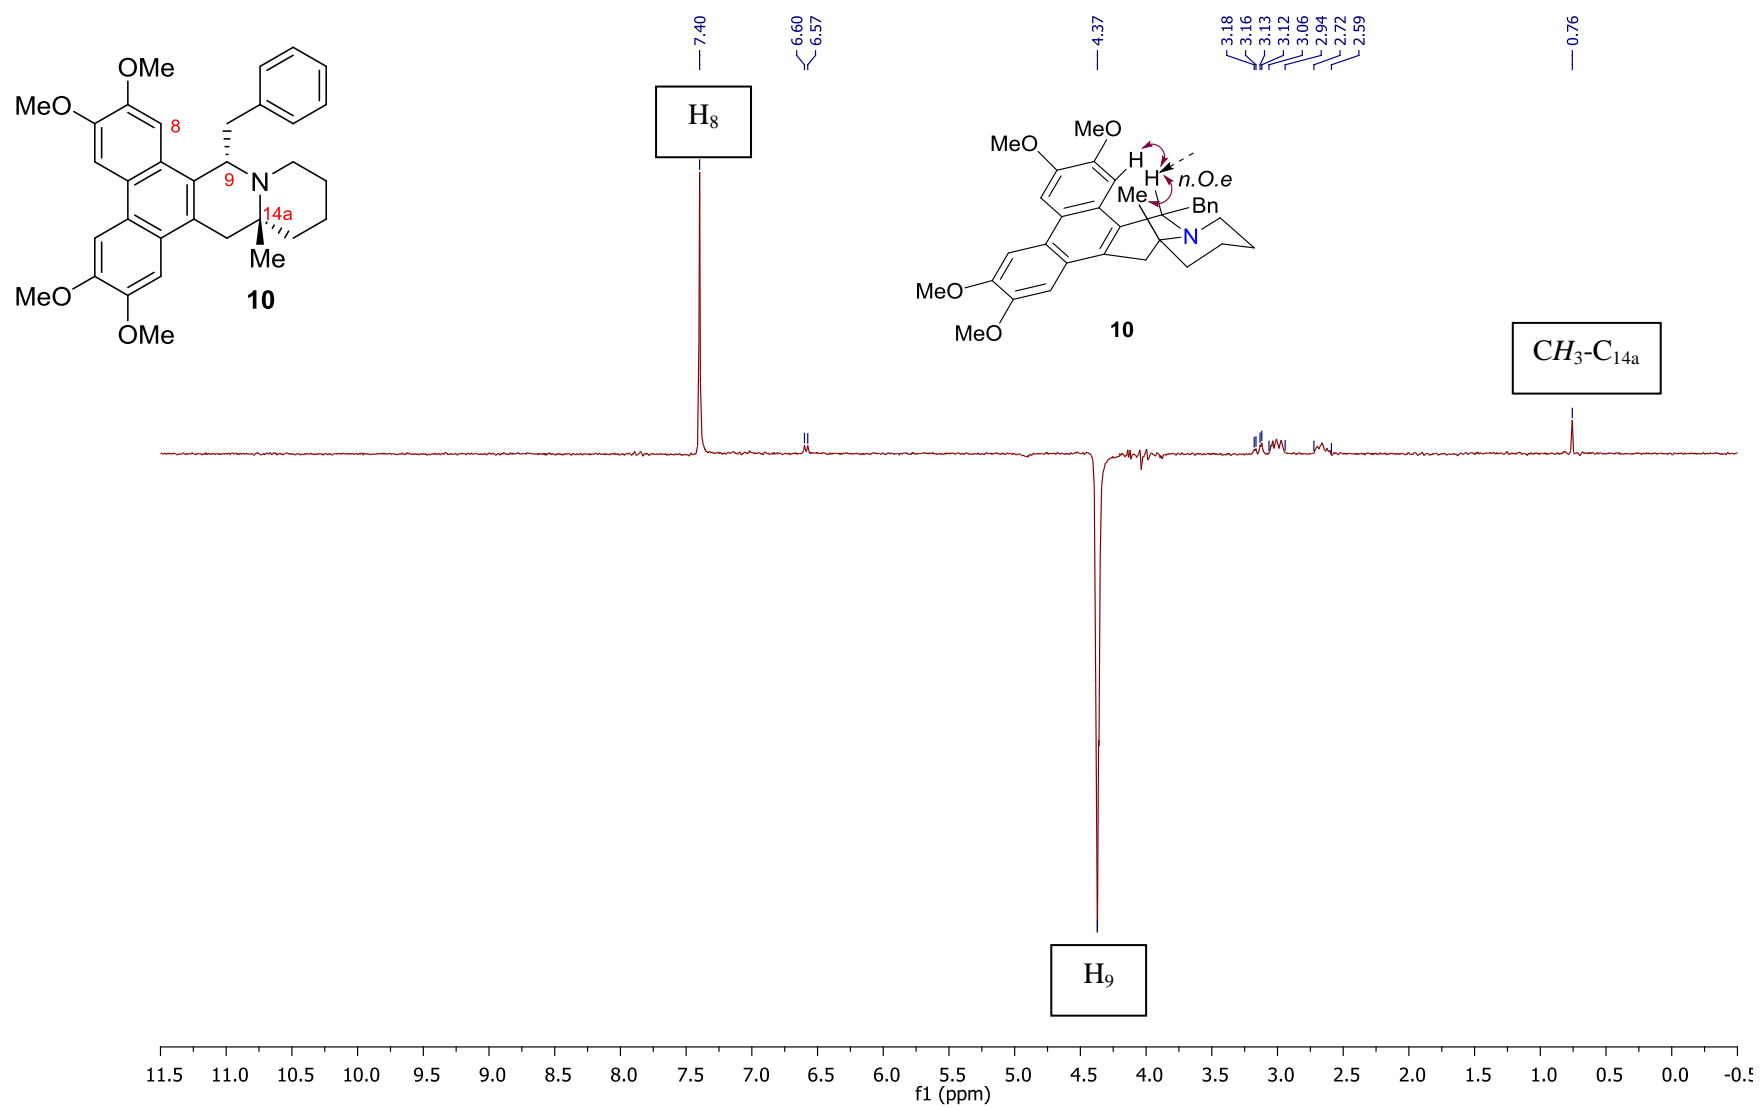

HPLC traces of compounds **10**/ *ent-10*

CHIRALPAK IB column 4.6 mm x 250 mL; isocratic elution with 75:25:0.3, *n*-hexane/*i*-PrOH/TEA 1.0 mL·min<sup>-1</sup>; UV detection at 254 nm.

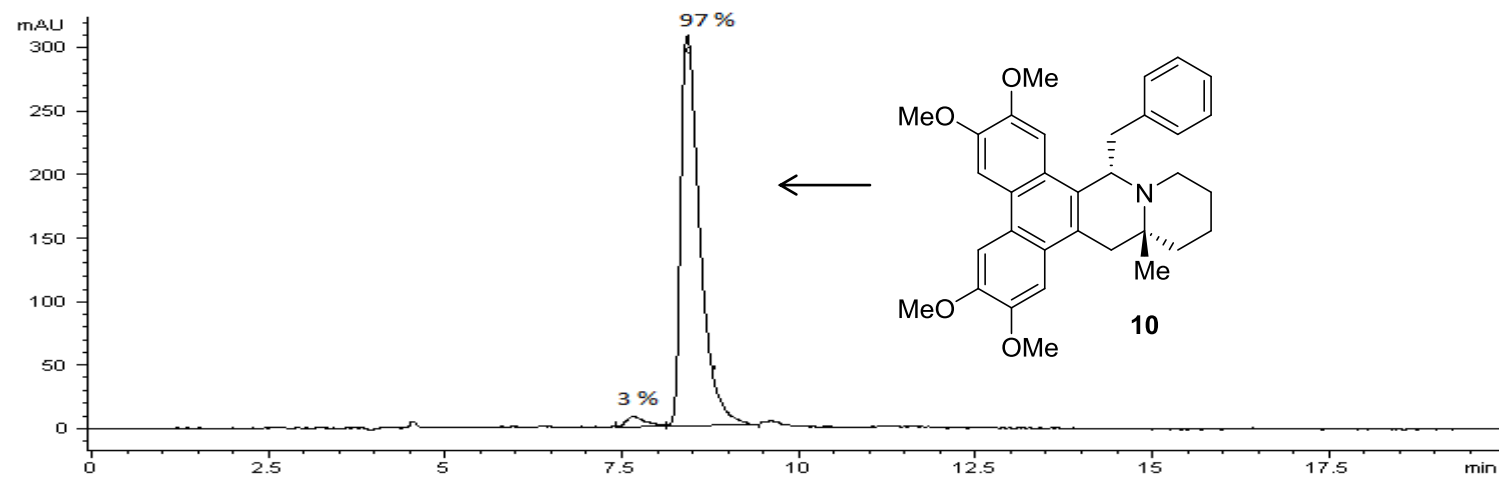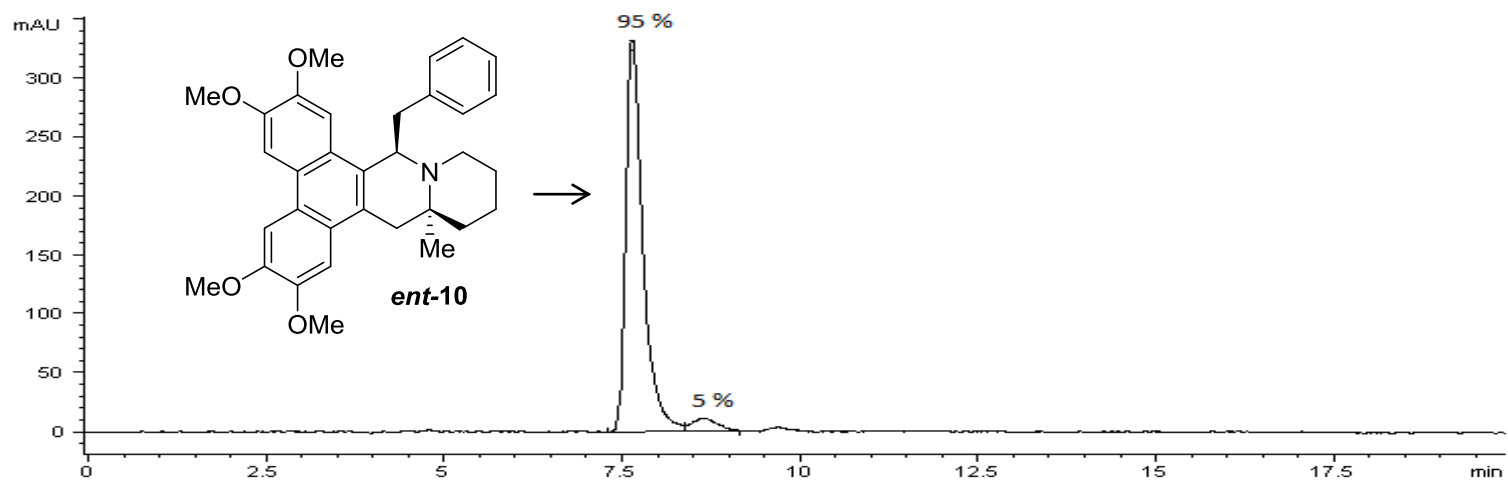

## Cytotoxic Studies

All the cell lines employed were purchased to the American Tissue Culture Collection (ATCC) and grown following the instructions and media from the provider.

Cells were seeded in 96-well culture microplates and kept at 37°C in a 5% CO<sub>2</sub> atmosphere for 24 h. Solutions of test compounds in MeOH were then added to each microplate, keeping 1% of MeOH, and incubated for different times depending on the cell line studied. After the incubation time cell viability was measured by using the tetrazolium dye assay (MTT method). Experiments were repeated three times.

Data was expressed as a percentage of inhibition in basis of the cell viability observed in vehicle-treated well following the formula:

%inhibition=100-((AO\*100)/AT); where AO is the absorbance observed in the test well and AT is the absorbance observed in the vehicle-treated wells (with 1% of MeOH to consider the effect of the solvent). Concentration-% inhibition were fitted by using GraphPad Prism (v2.1) following the equation:

$$y = \frac{E_{\max}}{1 + \frac{IC_{50}^n}{x^n}}$$

where E<sub>max</sub> is the inhibition observed at the maximum concentration examined for each compound (100 μM), IC<sub>50</sub> is the concentration that inhibits cell viability in a 50% and n is the Hill slope.

The seeding numbers and incubation times for each cell lines, as well as the concentration-response curves obtained for the compounds examined (including CDDP as a control experiment) were the following:

## MCF-7

Seeding number: 10000

Incubation time with test compound: 96 h

### **CDDP**

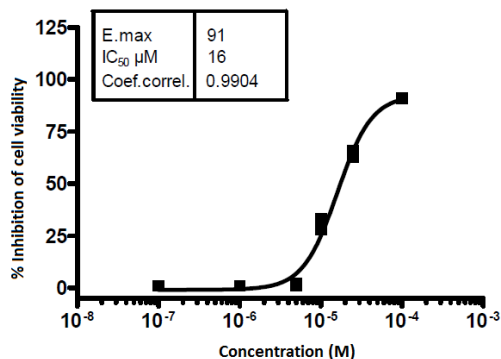

### **8·HCl**

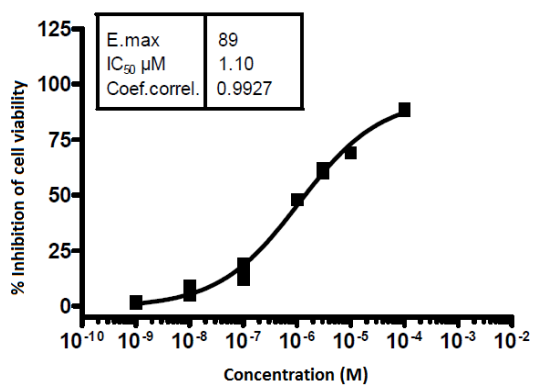

### **ent-8·HCl**

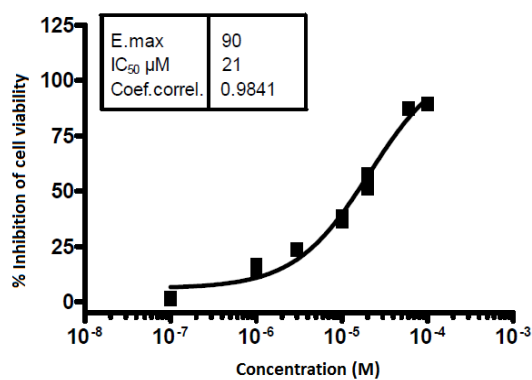

### **9**

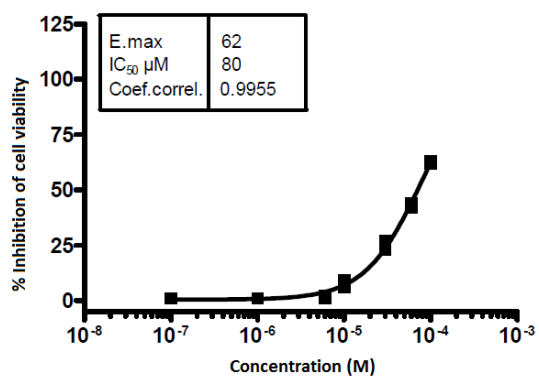

### **ent-9**

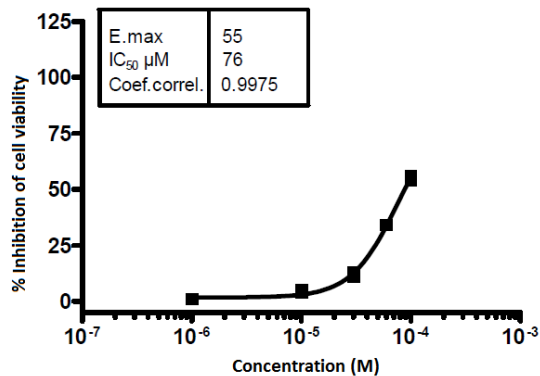

### **10**

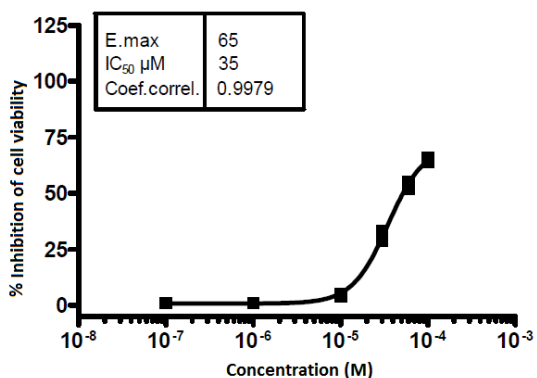

### **ent-10**

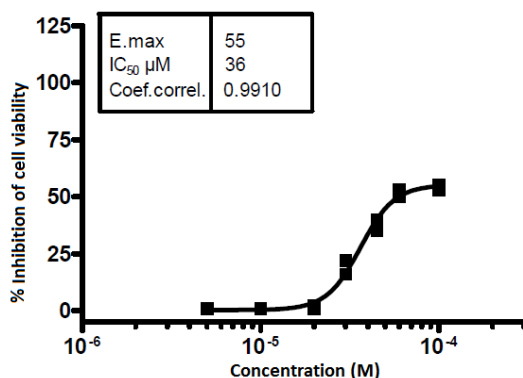

## NCI-H460

Seeding number: 15000

Incubation time with test compound: 48 h

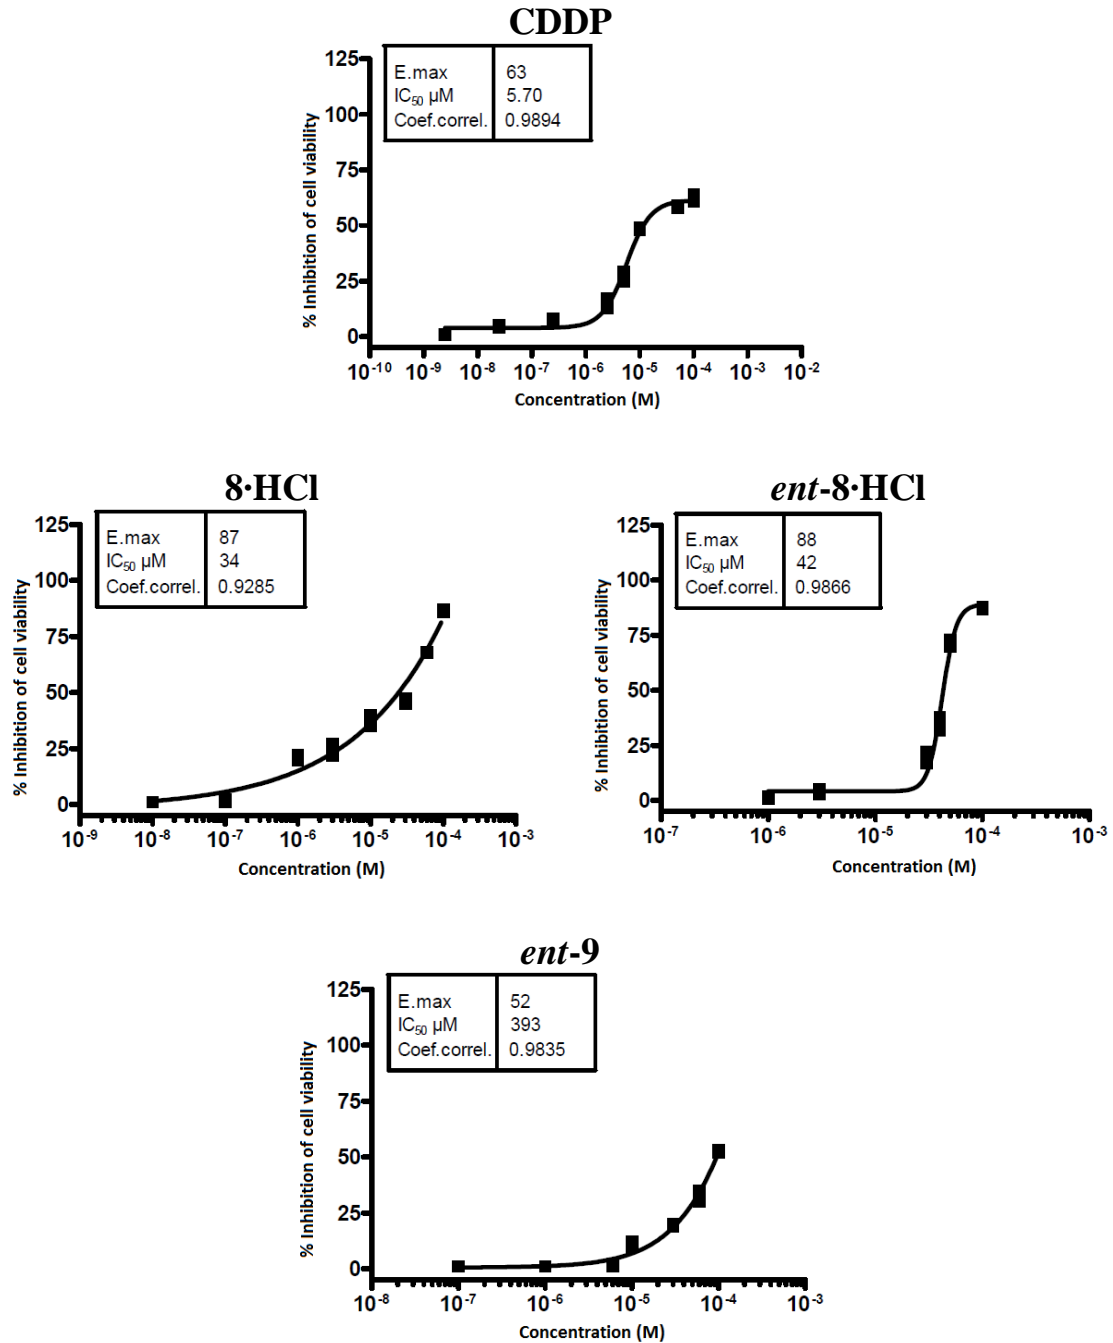

## HL-60

Seeding number: 10000

Incubation time with test compound: 24 h

### CDDP

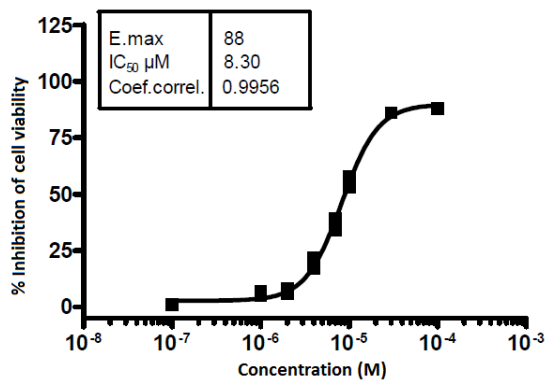

### 8·HCl

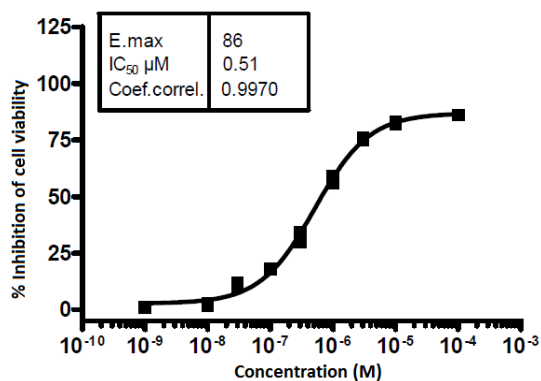

### ent-8·HCl

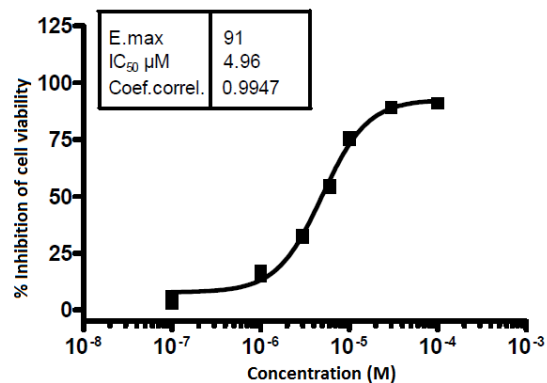

### 9

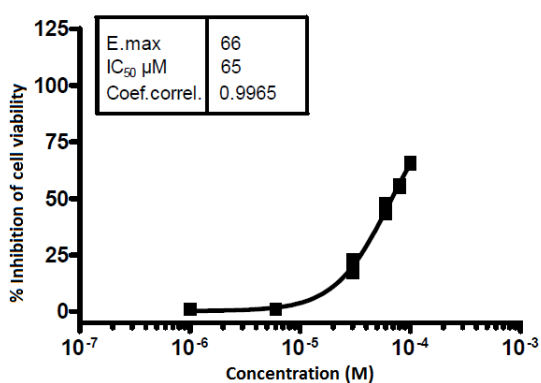

### 10

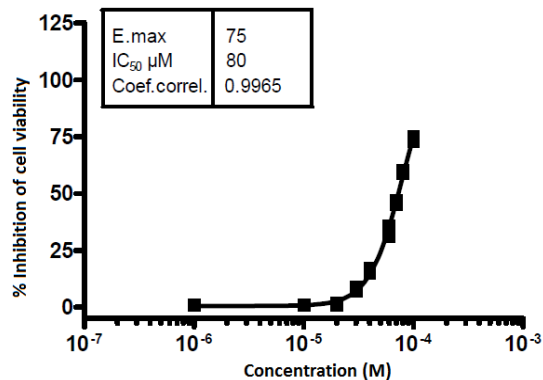

## NCI/ADR-RES

Seeding number: 15000

Incubation time with test compound: 48 h

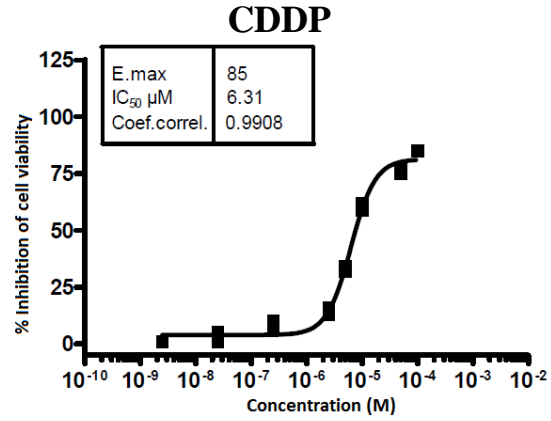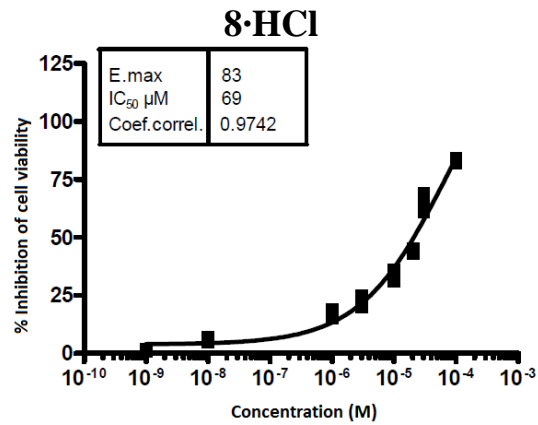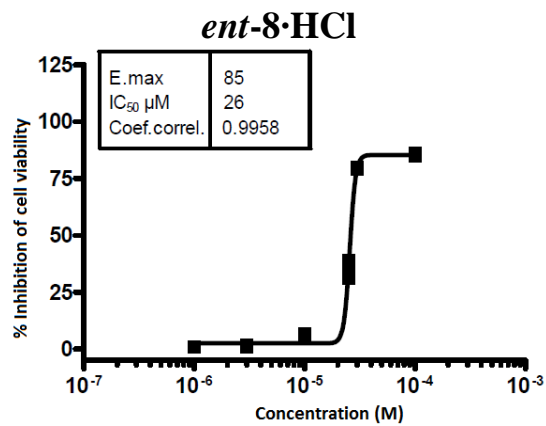

Supplement: c5ob02624e1.pdf [file c5ob02624e1.pdf]
